# Supplementary material
Source: PubMed Central journal article supplement (PMC10586348)
Supplement: NIHMS1885629-supplement-SupplementaryMaterial.pdf [file NIHMS1885629-supplement-SupplementaryMaterial.pdf]

# SUPPLEMENTARY MATERIALS: The Convex Mixture Distribution: Granger Causality for Categorical Time Series\*

Alex Tank<sup>†‡</sup>, Xiudi Li<sup>†§</sup>, Emily B. Fox<sup>¶</sup>, and Ali Shojaie<sup>||</sup>

## SM1. Experiments.

**SM1.1. mLTD Bach Analysis.** For the mLTD Bach analysis, we performed a 5-fold cross validation to select the tuning parameter  $\lambda$ , then thresholded the final connection weights, given by the standardised  $L_2$  norm of  $\mathbf{Z}^{ij}$ , at .01, as in the MTD case. First, we note that with only 5 total zero weights the final mLTD model is much less sparse than the MTD model. We display the final graph in Figure SM1, where, for interpretability, we bold edges with total weight greater than .45. In this graph there are strong connections in the counter-clockwise direction between G#, C#, F#, and B. However, the other connections on the circle of fifths are relatively weaker, and there are many more connections between notes far away on the circle of fifths. The mLTD graph also shows that the chord note both affects and is affected by many harmony notes. Furthermore, we see that the bass category is effected by most harmony notes as well. Overall, however, this graph is much less interpretable than the MTD graph and fails to find the full circle of fifths structure.

**SM1.2. iEEG Segmentation.** To segment the iEEG time series into a sequence of categorical states, we use a Markov switching autoregressive model. The model assumes that each channel in the  $d$ -dimensional EEG signal,  $\mathbf{y}_t \in \mathbb{R}^d$ , follows a Markov switching univariate autoregressive process (AR) each with the same  $m$  dynamic regimes. Specifically, let  $\mathbf{a}^1, \dots, \mathbf{a}^m$ , where  $\mathbf{a}^i = (a_1^i, \dots, a_h^i)$ , denote the lag  $h$   $\mathbf{AR}(\mathbf{h})$  parameters for each of the  $m$  dynamic regimes and let  $x_{jt}$  be the latent  $m$ -dimensional categorical state that governs the dynamics for channel  $j$  at time  $t$ . The model assumes that  $y_{jt}$  follows a locally stationary  $\mathbf{AR}(\mathbf{h})$  model with  $m$  state dynamics:

$$(SM1.1) \quad y_{jt} = \sum_{l=1}^h a_k^{x_{jt}} y_{j(t-l)} + e_{jt},$$

where the lag  $l$  AR dynamics at time  $t$ ,  $\mathbf{a}^{x_{jt}}$ , are indexed by the latent state,  $x_{jt}$ , and  $e_{jt}$  is mean zero Gaussian noise independent across series,  $E(e_{jt}) = 0$  and  $E(e_{jt}e_{j't'}) = 0$  for all  $(j, t) \neq (j', t')$ . The transitions between dynamic regimes are assumed to evolve independently

<sup>†</sup>Denotes equal contribution.

\*Submitted to the editors April 6th, 2020.

**Funding:** This work was partially funded by grants from the National Science Foundation (CAREER IIS-1350133, DMS-1161565, DMS-1561814) and the National Institutes of Health (R01GM114029).

<sup>‡</sup>The Voleon Group, Berkeley, CA ([alextank@uw.edu](mailto:alextank@uw.edu))

<sup>§</sup>Department of Biostatistics, University of Washington, Seattle WA ([xiudil@uw.edu](mailto:xiudil@uw.edu))

<sup>¶</sup>Departments of Computer Science & Engineering and Statistics, University of Washington, Seattle WA ([ebfox@uw.edu](mailto:ebfox@uw.edu))

<sup>||</sup>Department of Biostatistics, University of Washington, Seattle WA ([ashojaie@uw.edu](mailto:ashojaie@uw.edu))

## SM1

30 between series according to a hidden Markov model. See [SM11] for more details on the model.  
 31 Due to the long length of the series, we use a stochastic gradient MCMC algorithm [SM7] to  
 32 fit the model with  $m = 5$  categorical states. We display the segmentation of a single channel  
 using this method in Figure SM2.

mLTD Graph

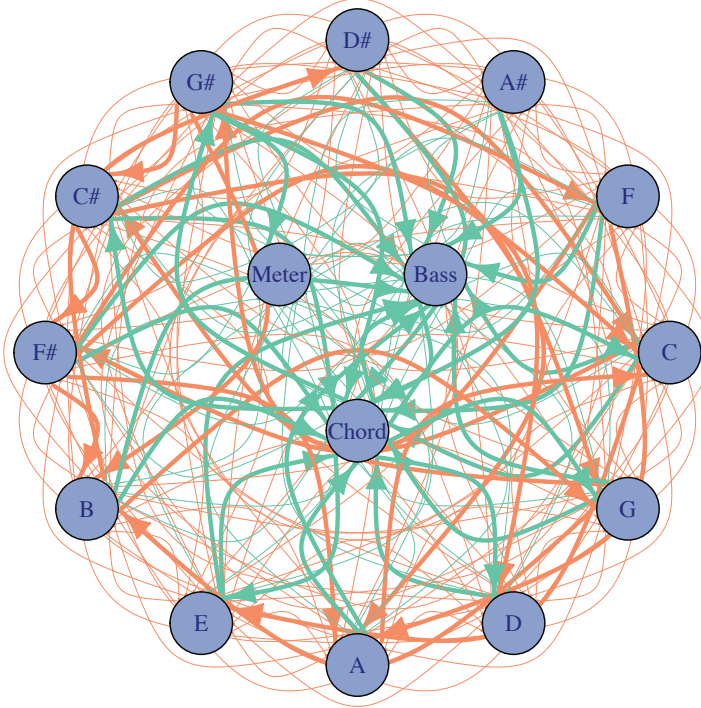

**Figure SM1.** The Granger causality graph for the ‘Bach Choral Harmony’ data set using the mLTD method. The harmony notes are displayed around the edge in a circle corresponding to the circle of fifths. Orange links display directed interactions between the harmony notes while green links display interactions to and from the ‘bass’, ‘chord’, and ‘meter’ variables.

33

34 **SM1.3. Additional Simulation Results.** Figure SM3 compares the signal strengths in the  
 35 mLTD and MTD models for the case where each series has  $m = 4$  possible states and  $d = 15$ .  
 36 To capture the effect of time series  $j$  on time series  $i$ , we unfold the transition probability  
 37 tensor  $p(x_{it}|x_{1(t-1)}, \dots, x_{d(t-1)})$  along the mode defined by  $x_{j(t-1)}$ , and obtain an  $m \times m^d$   
 38 matrix. We then compute the  $l_2$  distances between any two rows of the resulting matrix. For  
 39 the MTD model, this is equivalent (up to scaling) to the  $l_2$  distance between columns of  $\mathbf{Z}^{ij}$ ,  
 40 since the effect is additive. We repeat this procedure for all  $(i, j)$  pairs and aggregate the  
 41 results over 20 replications. Figure SM3 shows a histogram of nonzero signals in the MTD  
 42 and mLTD models.

43 We observe that, in our simulation settings, the difference among transition probabilities  
 44 in the mLTD model is larger than that in the MTD model, leading to stronger connections.

45 Next, we present median ROC curves over 20 replications for the proposed methods, under

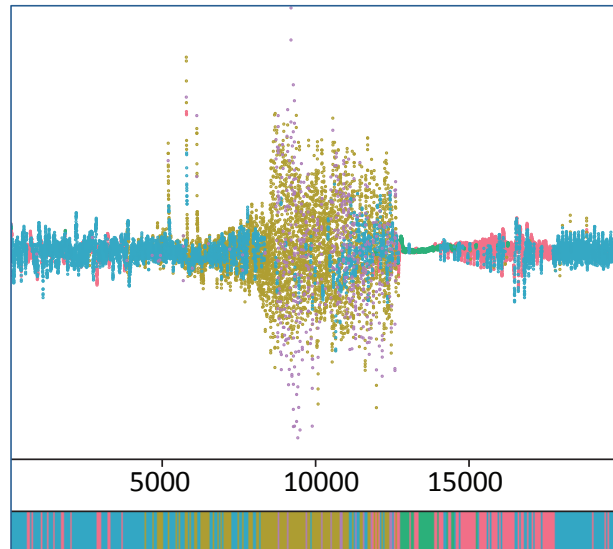

**Figure SM2.** Colored segmentation with  $m = 5$  states of a single *i*EEG channel during a seizure using the Markov switching autoregressive model.

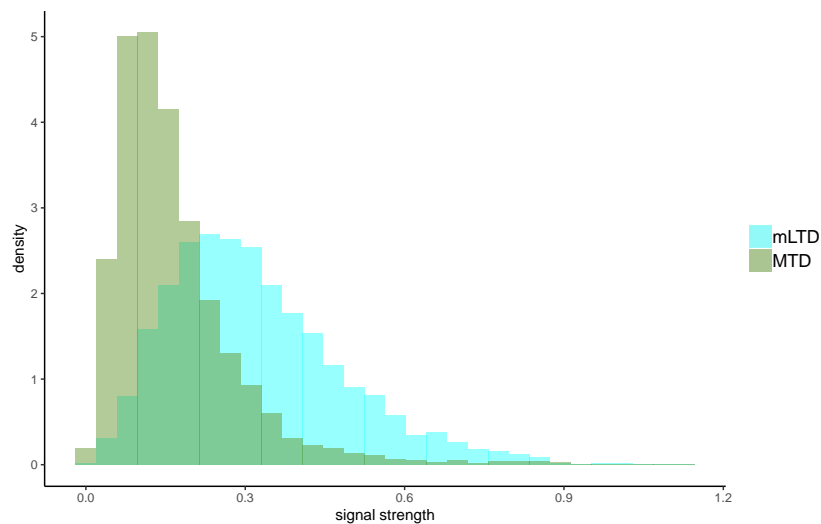

**Figure SM3.** Signal strengths in the *mLTD* and *MTD* models.

46 different simulation settings. The results displayed in Figures SM4-SM5, Figures SM6-SM7  
 47 and Figures SM8-SM9, correspond to data generated by MTD, *mLTD* and latent VAR models,  
 48 respectively. We observe that for all three methods, the performance improves with increasing  
 49 sample size  $T$  and worsens with increasing dimension  $d$ .

50 We also show the points on the ROC curves that correspond to tuning parameter values

51 chosen by BIC and cross-validation. In general, cross-validation tends to over-select Granger  
 52 causality relationships. This highlights the importance of thresholding when using cross-  
 53 validation in practice. In contrast, BIC generally gives an overly sparse model when sample  
 54 size is small; but it performs much better with large sample sizes.

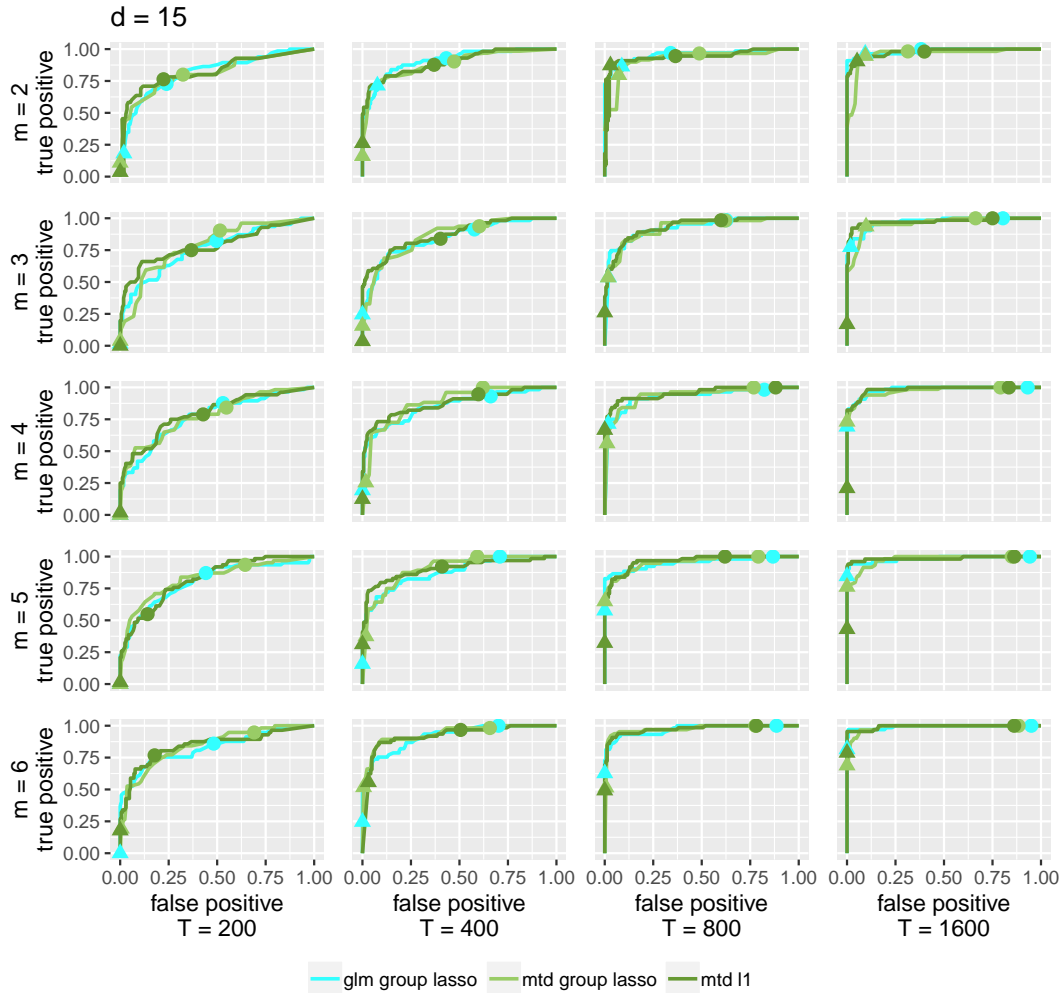

**Figure SM4.** Median ROC curves over 20 simulation runs, for data generated by a sparse MTD process with  $d = 15$ . Triangles correspond to tuning parameter values chosen by BIC; while dots correspond to the values chosen by cross-validation.

55 Finally, in Figure SM10, we show the average run time of the three proposed methods  
 56 under different sample size  $T$  and number of time series  $d$ , where each time series has 4  
 57 categories. We observe that in general mLTD group lasso runs faster than MTD with either  
 58 group lasso or lasso penalty. This is due to the constraints on the parameter set in the MTD  
 59 model, which requires additional projection steps. For all three methods, the run time scales

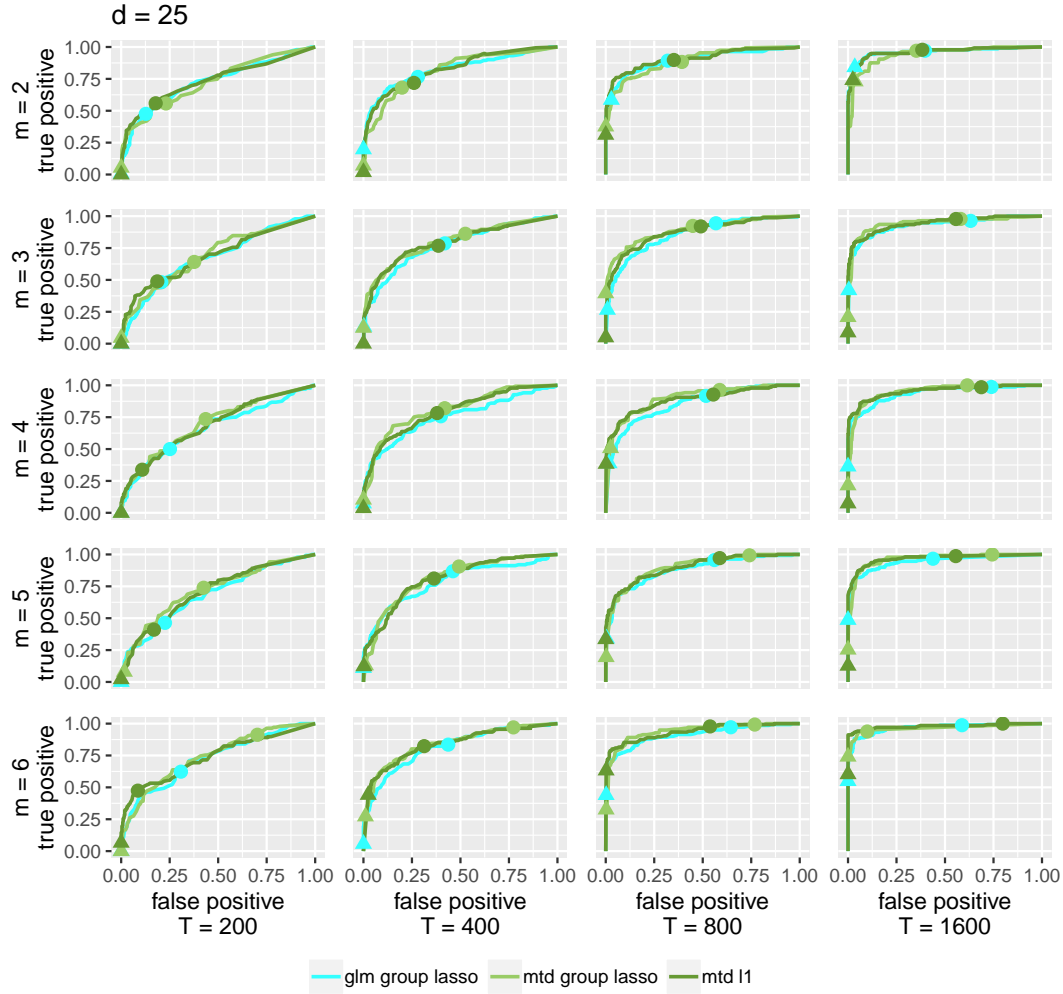

**Figure SM5.** Median ROC curves over 20 simulation runs, for data generated by a sparse MTD process with  $d = 25$ . Triangles correspond to tuning parameter values chosen by BIC; while dots correspond to the values chosen by cross-validation.

60 nearly linearly in sample size.

61 **SM2. Proofs of Results in Section 3.**

62 *Proof of Proposition 3.3.* If the columns of  $\mathbf{Z}^j$  are all equal, then for all fixed values of  
 63  $x_{\setminus j(t-1)}$  the conditional distribution is the same for all values of  $x_{j(t-1)}$ . If one column is  
 64 different, then the conditional distribution for all values of  $x_{\setminus j(t-1)}$  will depend on  $x_{j(t-1)}$ .

65 To prove the second claim, we let  $\mathbf{Z}$  and  $\tilde{\mathbf{Z}}$  be two parameterizations for the same MTD  
 66 model. Suppose that they give different causality conclusions. Then, there exists some  $j \in$   
 67  $\{1, \dots, d\}$  such that the columns of  $\mathbf{Z}^j$  are all equal, while the columns of  $\tilde{\mathbf{Z}}^j$  are not, or the  
 68 other way around. There must thus exist a row where at least two columns differ in this row.

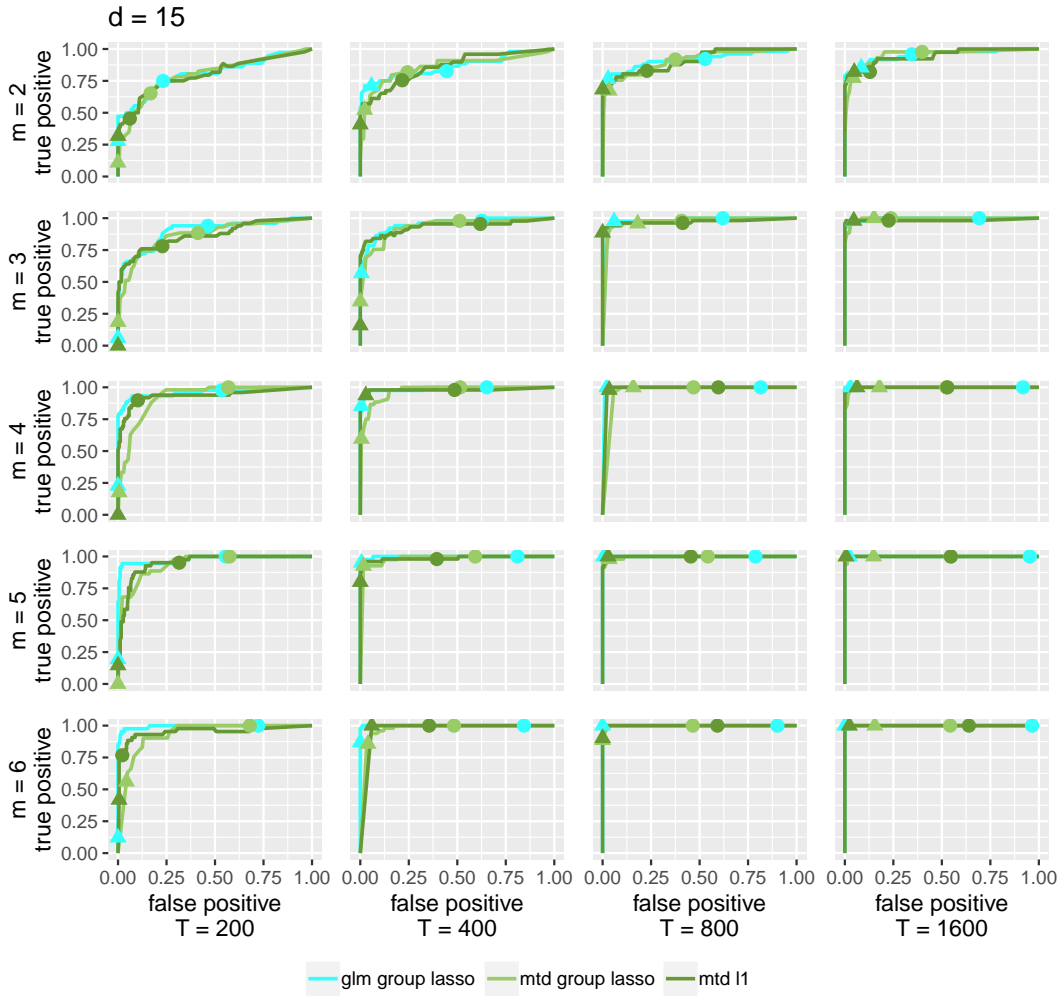

**Figure SM6.** Median ROC curves over 20 simulation runs, for data generated by a sparse mLTD process with  $d = 15$ . Triangles correspond to tuning parameter values chosen by BIC; while dots correspond to the values chosen by cross-validation.

Without loss of generality, we assume that  $\mathbf{Z}_{11}^1 \neq \mathbf{Z}_{12}^1$  but  $\tilde{\mathbf{Z}}_{11}^1 = \tilde{\mathbf{Z}}_{12}^1$ . Then under  $\mathbf{Z}$ , we have that

$$P(x_{it} = 1 | x_{1(t-1)} = 1, x_{2(t-1)}, \dots, x_{d(t-1)}) \neq P(x_{it} = 1 | x_{1(t-1)} = 2, x_{2(t-1)}, \dots, x_{d(t-1)}).$$

However, under  $\tilde{\mathbf{Z}}$  we have that

$$P(x_{it} = 1 | x_{1(t-1)} = 1, x_{2(t-1)}, \dots, x_{d(t-1)}) = P(x_{it} = 1 | x_{1(t-1)} = 2, x_{2(t-1)}, \dots, x_{d(t-1)}).$$

69 This is a clear contradiction, as  $\tilde{\mathbf{Z}}$  and  $\mathbf{Z}$  are different parameterizations of the same model,  
 70 and hence all conditional probabilities should be the same. ■

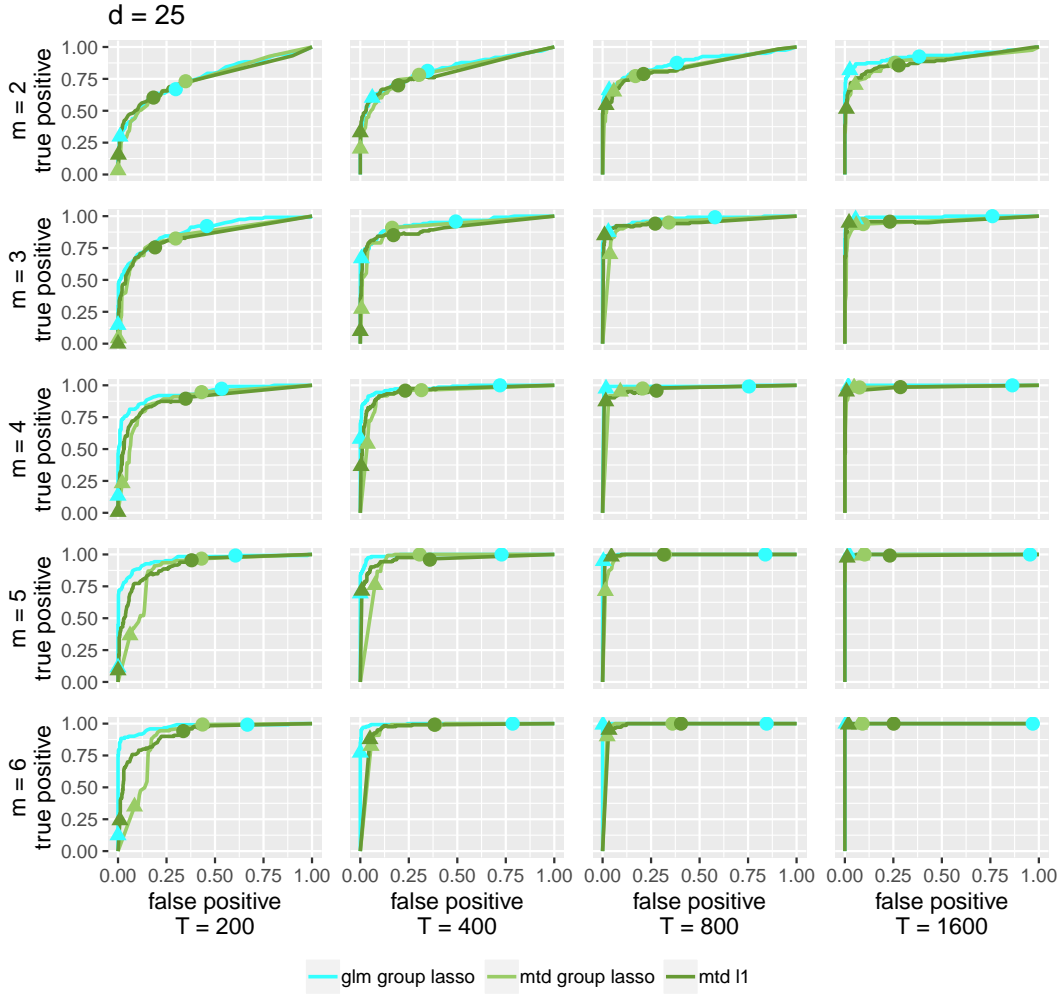

**Figure SM7.** Median ROC curves over 20 simulation runs, for data generated by a sparse mLTD process with  $d = 25$ . Triangles correspond to tuning parameter values chosen by BIC; while dots correspond to the values chosen by cross-validation.

71 *Proof of Theorem 1.* First we show that any parameter set  $\mathbf{Z}$  can be converted to another  
 72 set  $\tilde{\mathbf{Z}}$  that contains at least one 0 element in each row of each matrix; and that  $\tilde{\mathbf{Z}}$  satisfies the  
 73 constraints of the MTD model. Let  $\mathbf{Z}$  be the parameter set for an MTD model. For each  $\mathbf{Z}^j$   
 74 let the vector  $\alpha^j$  be the minimal element in each row,  $\alpha_k^j = \min \mathbf{Z}_{k\cdot}^j$ . Let  $\tilde{\mathbf{Z}}^j = \mathbf{Z}^j - \alpha^j$  and  
 75  $\tilde{\mathbf{z}}^0 = \mathbf{z}^0 + \sum_{j=1}^d \alpha_j$ . This  $\tilde{\mathbf{Z}}$  gives the same MTD distribution as  $\mathbf{Z}$ . Furthermore, this  $\tilde{\mathbf{Z}}$  has  
 76 a zero element in each row of each  $\tilde{\mathbf{Z}}^j$  by construction.

77 The non-negativity constraint is trivially satisfied by  $\tilde{\mathbf{Z}}$  as we subtract the minimum in each  
 78 row. For all  $j$ , we have that  $\mathbf{1}^T \mathbf{Z}^j = \gamma_j \mathbf{1}^T$ . Then  $\mathbf{1}^T \tilde{\mathbf{Z}}^j = \mathbf{1}^T (\mathbf{Z}^j - \alpha^j \mathbf{1}^T) = (\gamma_j - \mathbf{1}^T \alpha^j) \mathbf{1}^T =$   
 79  $\tilde{\gamma}_j \mathbf{1}^T$ , where we define  $\tilde{\gamma}_j = \gamma_j - \mathbf{1}^T \alpha^j$ . We note that  $\tilde{\gamma}_j \geq 0$  as we subtract the row minimum.

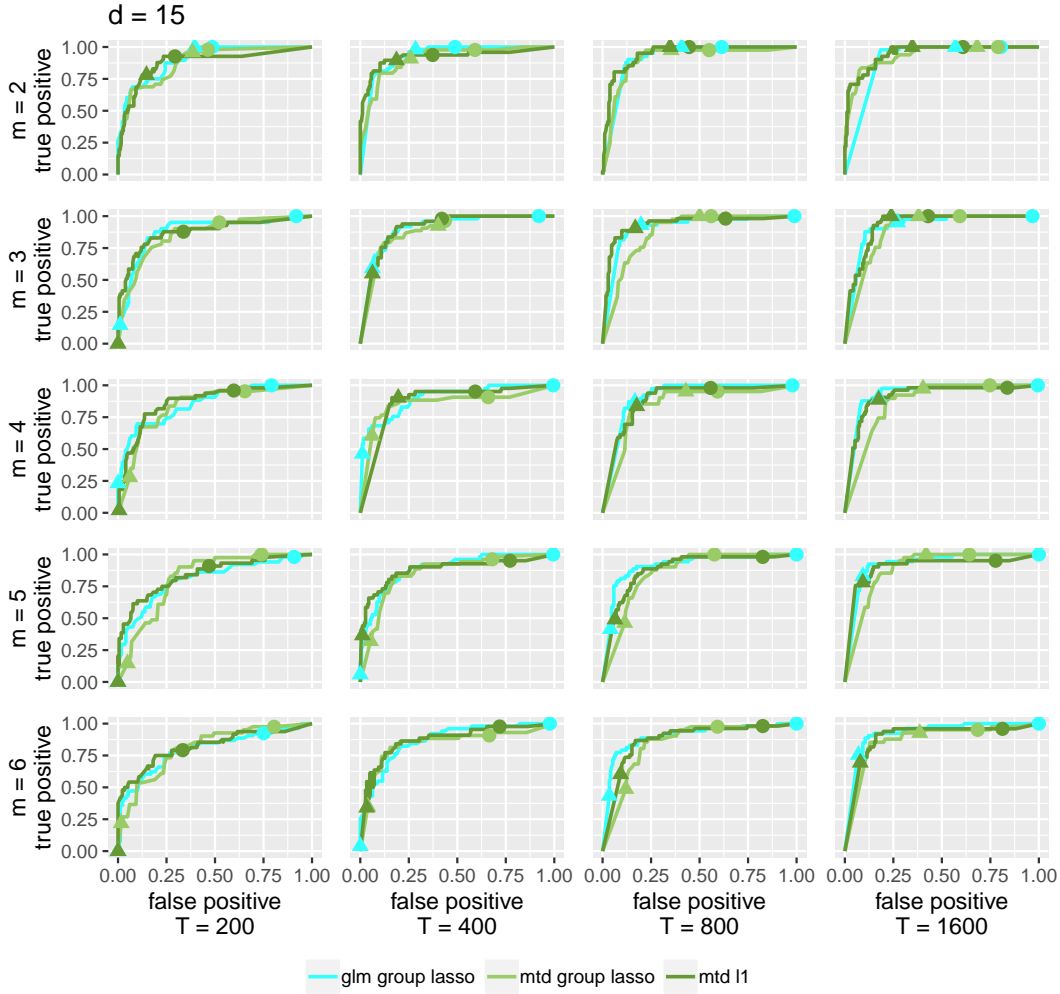

**Figure SM8.** Median ROC curves over 20 simulation runs, for data generated by a sparse latent VAR process with  $d = 15$ . Triangles correspond to tuning parameter values chosen by BIC; while dots correspond to the values chosen by cross-validation.

80 Hence within each  $\tilde{\mathbf{Z}}^j$ , the column sums are all equal. Finally, we have that  $\tilde{\gamma}_0 = \gamma_0 +$   
 81  $\sum_{j=1}^d \mathbf{1}^T \alpha^j$  and  $\sum_{j=0}^d \gamma_j = 1$ , so  $\sum_{j=0}^d \tilde{\gamma}_j = \gamma_0 + \sum_{j=1}^d \mathbf{1}^T \alpha^j + \sum_{j=1}^d (\gamma_j - \mathbf{1}^T \alpha^j) = \sum_{j=0}^d \gamma_j =$   
 82 1. Hence  $\tilde{\gamma}_j$ 's sum up to 1.

83 Next, we show that this new parameter set is uniquely determined. Suppose two parameter  
 84 sets  $\mathbf{X}$  and  $\mathbf{Y}$  provide the same MTD distribution. Let  $\tilde{\mathbf{X}}$  be as above for  $\mathbf{X}$  and  $\tilde{\mathbf{Y}}$  of  $\mathbf{Y}$ .

85 We use a proof by contradiction. Suppose that  $\tilde{\mathbf{Y}} \neq \tilde{\mathbf{X}}$ . There must exist some  $j$  and some  
 86 row  $k$  such that  $\tilde{\mathbf{X}}_{k:}^j \neq \tilde{\mathbf{Y}}_{k:}^j$ . Let  $l_X$  be the index of the zero element for  $\mathbf{X}^j$ , i.e., such that  
 87  $\tilde{\mathbf{X}}_{kl}^j = 0$ , and likewise for  $l_Y$ . If there are more than one zero elements, pick any. Furthermore,  
 88 if  $\tilde{\mathbf{X}}_{k:}^j$  and  $\tilde{\mathbf{Y}}_{k:}^j$  share a zero in the same location (if there are one or more zero elements in



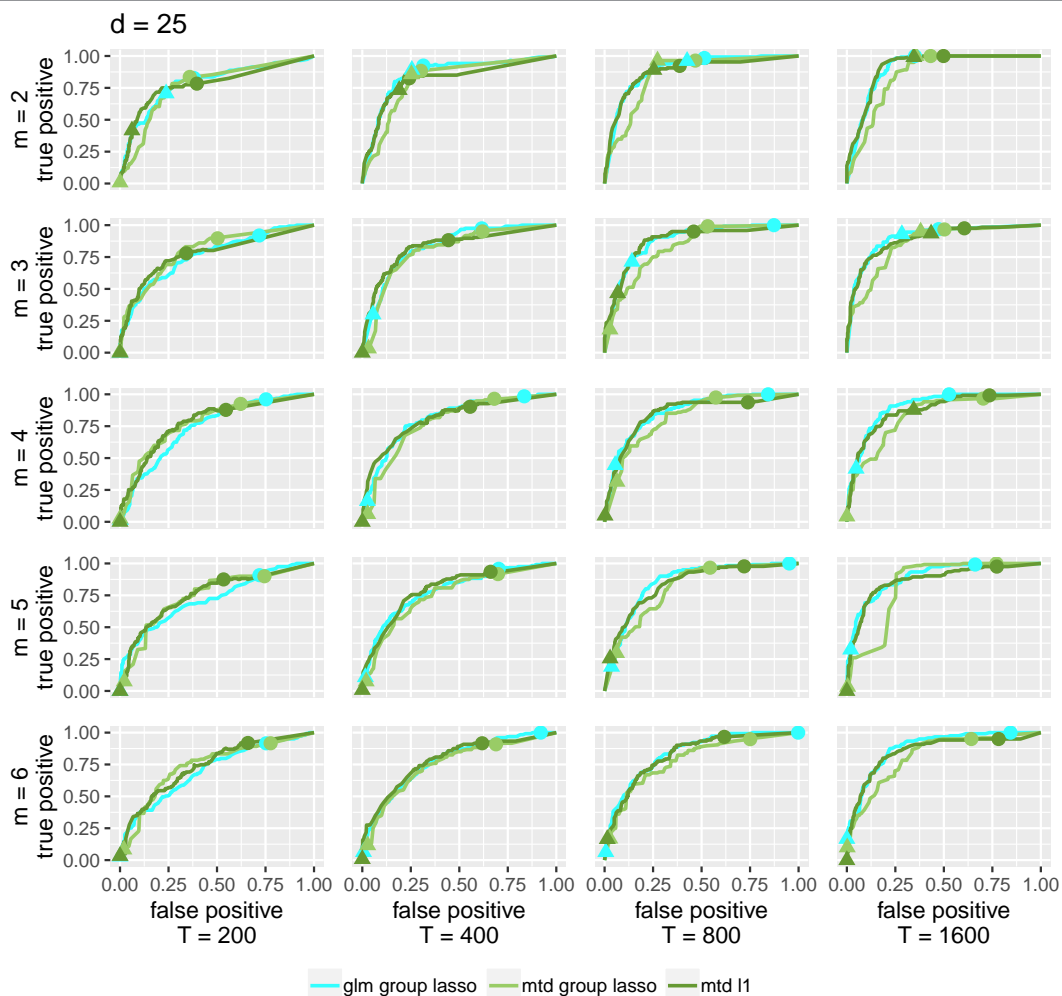

**Figure SM9.** Median ROC curves over 20 simulation runs, for data generated by a sparse latent VAR process with  $d = 25$ . Triangles correspond to tuning parameter values chosen by BIC; while dots correspond to the values chosen by cross-validation.

89 each), then let  $l_X$  and  $l_Y$  be that index so that  $l_X = l_Y$ .

90 If  $l_X = l_Y$ , let  $l'$  be an index such that  $\tilde{\mathbf{X}}_{kl'}^j \neq \tilde{\mathbf{Y}}_{kl'}^j$ . This index must exist by construction.

91 Let the categories of other series (not for series  $j$ ),  $x_{\setminus j(t-1)}$ , be fixed arbitrarily. The difference

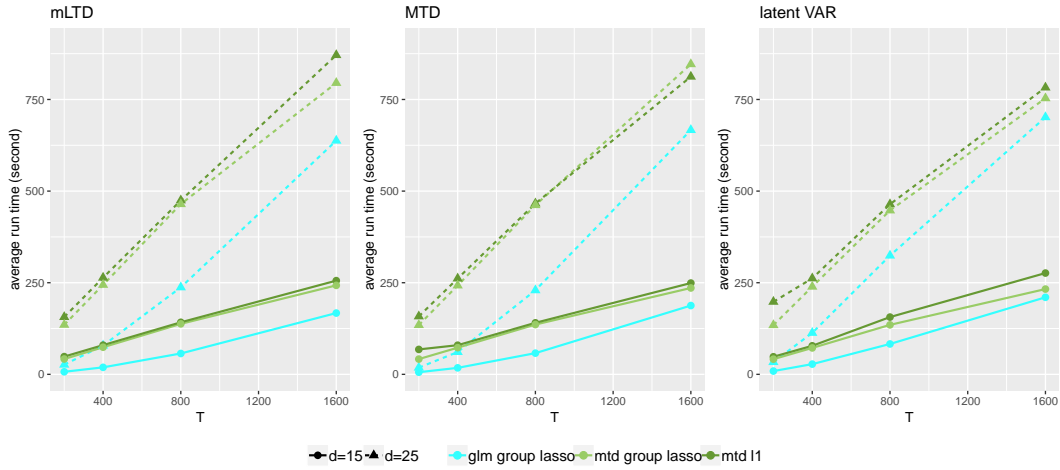

**Figure SM10.** Average run time of three proposed methods over 10 replications, with  $m = 4$  and  $\lambda = 100$  for MTD group lasso, MTD  $L_1$  and  $\lambda = 12.5$  for mLTD group lasso.

92 between the conditional distributions for  $\mathbf{X}$  are

$$\begin{aligned}
 \tilde{\mathbf{X}}_{kl'}^j &= \tilde{\mathbf{X}}_{kl'}^j - \tilde{\mathbf{X}}_{kl_X}^j \\
 &= \left( \tilde{\mathbf{X}}_{kl'}^j + \alpha_{jk} \right) - \left( \tilde{\mathbf{X}}_{kl_X}^j + \alpha_{jk} \right) \\
 &= \mathbf{X}_{kl'}^j - \mathbf{X}_{kl_X}^j \\
 &= \left( \mathbf{x}_k^0 + \sum_{i \in \setminus j} \mathbf{X}_{kx_i(t-1)}^i + \mathbf{X}_{kl'}^j \right) - \left( \mathbf{x}_k^0 + \sum_{i \in \setminus j} \mathbf{X}_{kx_i(t-1)}^i + \mathbf{X}_{kl_X}^j \right) \\
 &= p_X(x_t = k | x_{\setminus j(t-1)}, x_{j(t-1)} = l') - p_X(x_t = k | x_{\setminus j(t-1)}, x_{j(t-1)} = l_X).
 \end{aligned}$$

95 A similar calculation for  $\mathbf{Y}$  shows that

$$\tilde{\mathbf{Y}}_{kl'}^j = p_Y(x_t = k | x_{\setminus j(t-1)}, x_{j(t-1)} = l') - p_Y(x_t = k | x_{\setminus j(t-1)}, x_{j(t-1)} = l_Y).$$

98 However,  $\tilde{\mathbf{Y}}_{kl'}^j \neq \tilde{\mathbf{X}}_{kl'}^j$ , thus showing that

$$\begin{aligned}
 &p_Y(x_t = k | x_{\setminus j(t-1)}, x_{j(t-1)} = l') - p_Y(x_t = k | x_{\setminus j(t-1)}, x_{j(t-1)} = l_Y) \neq \\
 &p_X(x_t = k | x_{\setminus j(t-1)}, x_{j(t-1)} = l') - p_X(x_t = k | x_{\setminus j(t-1)}, x_{j(t-1)} = l_X).
 \end{aligned}$$

101 This inequality contradicts our assumption that the MTD distributions parametrized by  $\mathbf{X}$   
 102 and  $\mathbf{Y}$  are the same since  $l_X = l_Y$ .

103 If  $l_X \neq l_Y$ , then

$$p_X(x_t = k | x_{\setminus j(t-1)}, x_{j(t-1)} = l_Y) - p_X(x_t = k | x_{\setminus j(t-1)}, x_{j(t-1)} = l_X) = \tilde{\mathbf{X}}_{kl_Y}^j,$$

106 and

$$p_Y(x_t = k | x_{\setminus j(t-1)}, x_{j(t-1)} = l_Y) - p_Y(x_t = k | x_{\setminus j(t-1)}, x_{j(t-1)} = l_X) = -\tilde{\mathbf{Y}}_{kl_X}^j.$$

109 However,  $-\tilde{\mathbf{Y}}_{kl_X}^j \neq \tilde{\mathbf{X}}_{kl_Y}^j$  since at least one of  $\tilde{\mathbf{Y}}_{kl_X}^j$  and  $\tilde{\mathbf{X}}_{kl_Y}^j$  are nonzero and both are  
 110 nonnegative. Again, this shows that

$$111 \quad p_Y(x_t = k | x_{\setminus j(t-1)}, x_{j(t-1)} = l_Y) - p_Y(x_t = k | x_{\setminus j(t-1)}, x_{j(t-1)} = l_X) \neq$$

$$112 \quad p_X(x_t = k | x_{\setminus j(t-1)}, x_{j(t-1)} = l_Y) - p_X(x_t = k | x_{\setminus j(t-1)}, x_{j(t-1)} = l_X),$$

114 which contradicts our assumption that the MTD distributions parametrized by  $\mathbf{X}$  and  $\mathbf{Y}$  are  
 115 the same.

116 The same argument shows that the reduction is unique. ■

117 *Proof of Proposition 3.1.* First we check the parameter set satisfies the constraints of MTD  
 118 model. Since  $\mathbf{Z}$  and  $\tilde{\mathbf{Z}}$  are valid MTD parameter sets, we have that  $\forall j, \mathbf{1}^T \mathbf{Z}^j = \gamma_j \mathbf{1}^T, \mathbf{Z}^j \geq$   
 119  $0; \mathbf{1}^T \tilde{\mathbf{Z}}^j = \tilde{\gamma}_j \mathbf{1}^T, \tilde{\mathbf{Z}}^j \geq 0$ , and  $\mathbf{1}^T \gamma = 1, \gamma \geq 0; \mathbf{1}^T \tilde{\gamma} = 1, \tilde{\gamma} \geq 0$ . Consider the new parameter set  
 120  $\alpha \mathbf{Z} + (1 - \alpha) \tilde{\mathbf{Z}}$ ; we have that for all  $j$ ,

$$121 \quad \mathbf{1}^T (\alpha \mathbf{Z}^j + (1 - \alpha) \tilde{\mathbf{Z}}^j)$$

$$122 \quad = \alpha (\mathbf{1}^T \mathbf{Z}^j) + (1 - \alpha) (\mathbf{1}^T \tilde{\mathbf{Z}}^j)$$

$$123 \quad = (\alpha \gamma_j + (1 - \alpha) \tilde{\gamma}_j) \mathbf{1}^T$$

$$124 \quad = \bar{\gamma}_j \mathbf{1}^T,$$

126 where we define  $\bar{\gamma}_j = \alpha \gamma_j + (1 - \alpha) \tilde{\gamma}_j$  for all  $j$ . Then

$$127 \quad (\text{SM2.1}) \quad \mathbf{1}^T \bar{\gamma} = \mathbf{1}^T (\alpha \gamma + (1 - \alpha) \tilde{\gamma}) = \alpha + (1 - \alpha) = 1.$$

128 Finally since  $\mathbf{Z}^j, \tilde{\mathbf{Z}}^j, \gamma$  and  $\tilde{\gamma}$  are all non-negative, we have that  $\alpha \mathbf{Z}^j + (1 - \alpha) \tilde{\mathbf{Z}}^j \geq 0 \forall j$  and  
 129  $\bar{\gamma} \geq 0$ .

130 Next we demonstrate that the probability tensor given by this new parameter set is the  
 131 same as those given by  $\mathbf{Z}$  and  $\tilde{\mathbf{Z}}$ . For any two MTD factorizations  $\mathbf{Z}$  and  $\tilde{\mathbf{Z}}$  that have the  
 132 same conditional distribution  $p(x_{kt} | x_{t-1})$  for all  $x_{kt}$  and  $x_{t-1}$ , then for any  $0 < \alpha < 1$ , the  
 133 probability tensor of the MTD model for the parameter set  $\alpha \mathbf{Z} + (1 - \alpha) \tilde{\mathbf{Z}}$  is given by

$$134 \quad \alpha \mathbf{z}_{x_{kt}}^0 + (1 - \alpha) \tilde{\mathbf{z}}_{x_{kt}}^0 + \sum_{j=1}^d \left( \alpha \mathbf{Z}_{x_{kt} x_{j(t-1)}}^j + (1 - \alpha) \tilde{\mathbf{Z}}_{x_{kt} x_{j(t-1)}}^j \right)$$

$$135 \quad = \alpha \left( \mathbf{z}_{x_{kt}}^0 + \sum_{j=1}^d \mathbf{Z}_{x_{kt} x_{j(t-1)}}^j \right) + (1 - \alpha) \left( \tilde{\mathbf{z}}_{x_{kt}}^0 + \sum_{i=1}^d \tilde{\mathbf{Z}}_{x_{kt} x_{j(t-1)}}^j \right)$$

$$136 \quad = \alpha p(x_{kt} | x_{(t-1)}) + (1 - \alpha) p(x_{kt} | x_{(t-1)})$$

$$137 \quad = p(x_{kt} | x_{(t-1)}).$$

139 This shows that  $\alpha \mathbf{Z} + (1 - \alpha) \tilde{\mathbf{Z}}$  has the same distribution as both  $\mathbf{Z}$  and  $\tilde{\mathbf{Z}}$ , so that the set of  
 140 parameters with the same distribution is a convex set. ■

141 *Proof of Theorem 2.* First, we note that a solution always exists since the log likelihood  
 142  $L(\mathbf{Z}) = -\sum_{t=1}^T \log \left( \mathbf{z}_{x_{it}}^0 + \sum_{j=1}^d \mathbf{Z}_{x_{it} x_{j(t-1)}}^j \right)$  and penalty are both bounded below by zero and

143 the feasible set is closed and bounded. Suppose an optimal solution is  $\mathbf{Z}$  for which there exists  
 144 some  $j$  such that one row, call it  $k$ , of  $\mathbf{Z}^j$  does not have a zero element. Let  $\alpha = \min(\mathbf{Z}_{k:}^j)$   
 145 be the minimum value in row  $k$  and let  $\tilde{\mathbf{Z}}^j$  be equal to  $\mathbf{Z}^j \forall j$  except that  $\tilde{\mathbf{Z}}_{k:}^j = \mathbf{Z}_{k:}^j - \alpha$  and  
 146  $\tilde{z}_k^0 = z_k^0 + \alpha$ . Due to the nonidentifiability of the MTD model  $L(\tilde{\mathbf{Z}}) = L(\mathbf{Z})$ , while we have  
 147 that  $\Omega(\tilde{\mathbf{Z}}^j) < \Omega(\mathbf{Z}^j)$ , implying for  $\lambda > 0$

$$148 \quad L(\tilde{\mathbf{Z}}) + \lambda \Omega(\tilde{\mathbf{Z}}) < L(\mathbf{Z}) + \lambda \Omega(\mathbf{Z}),$$

150 showing that  $\mathbf{Z}$  cannot be an optima. ■

151 **SM3. Proof of Estimation Consistency.** First, we re-introduce some of our notations.  
 152 Recall that we define a covariate vector  $W \in \mathbb{R}^{m+dm^2}$  as follows:  $W_t = (W_{t0}^T, W_{t1}^T, \dots, W_{td}^T)^T$ ;  
 153  $W_{t0} = (W_{t0}^1, \dots, W_{t0}^m)^T \in \mathbb{R}^m$  where  $W_{t0}^l = I\{x_{it} = l\}$ ; and  $W_{tj} = ((W_{tj}^1)^T, \dots, (W_{tj}^m)^T)^T \in$   
 154  $\mathbb{R}^{m^2}$ , for  $j \in \{1, \dots, d\}$ , where  $W_{tj}^l = (W_{tj}^{l1}, \dots, W_{tj}^{lm})^T$  and  $W_{tj}^{lk} = I\{x_{it} = l, x_{j(t-1)} = k\}$ .  
 155 Let  $\mathcal{A}_t$  denote the sub  $\sigma$ -algebra generated by  $x_1, \dots, x_t$ . Then  $\{W_t\}$  is adapted to  $\{\mathcal{A}_t\}$ . For  
 156 a general MTD parameter set, we collect the parameters in a vector form  $\beta \in \mathbb{R}^{m+dm^2}$  where  
 157  $\beta = (\beta_0^T, \beta_1^T, \dots, \beta_d^T)^T$ ,  $\beta_0 = \mathbf{z}^0$  and  $\beta_j = \text{vec}(\mathbf{Z}^j)$  for  $j \in \{1, \dots, d\}$ . The MTD model can be  
 158 written as

$$159 \quad (\text{SM3.1}) \quad p(x_{it}|x_{t-1}) = W_t^T \beta.$$

160 For a general  $\beta$ , we define  $R_n$  and  $R$  to be the empirical and conditional expected negative  
 161 log-likelihood risks, respectively,

$$162 \quad (\text{SM3.2}) \quad R_n(\beta) = -\frac{1}{T} \sum_{t=1}^T \log(W_t^T \beta); \quad R(\beta) = -\frac{1}{T} \sum_{t=1}^T \mathbb{E} [\log(W_t^T \beta) | \mathcal{A}_{t-1}].$$

163 Denote the group lasso penalty by  $\Omega(\beta) = \sum_{j=1}^d \|\beta_j\|_2 = \sum_{j=1}^d \|\mathbf{Z}^j\|_F$ . In the remainder of  
 164 this section, we will use the superscript 0 to denote the true parameter value.

165 We now turn to the proofs of the estimation consistency results.

166 **SM3.1. Proof of Lemma 6.2.** By definition, we have

$$167 \quad (\text{SM3.3}) \quad R_n(\beta) - R(\beta) - (R_n(\beta^0) - R(\beta^0))$$

$$169 \quad = -\frac{1}{T} \sum_{t=1}^T \{(\log(W_t^T \beta) - \log(W_t^T \beta^0)) - \mathbb{E}[(\log(W_t^T \beta) - \log(W_t^T \beta^0)) | \mathcal{A}_{t-1}]\}.$$

171 For simplicity, we define  $\tilde{\Omega}(\beta) = \|\beta_0\|_1 + \Omega(\beta)$ . We will consider the following empirical process  
 172 indexed by  $f$ ,

$$173 \quad (\text{SM3.4}) \quad M_n(f) = \frac{1}{T} \sum_{t=1}^T (f(W_t) - \mathbb{E}[f(W_t) | \mathcal{A}_{t-1}]), \quad f \in \mathcal{F},$$

174 where the function class  $\mathcal{F}$  is defined as

$$175 \quad (\text{SM3.5}) \quad \mathcal{F} = \left\{ f : f(W_t) = \log(W_t^T \beta) - \log(W_t^T \beta^0), \tilde{\Omega}(\beta - \beta^0) \leq M \right\}.$$

176 In the following, we will consider expectation of the supremum of this empirical process. Since  
 177  $W^T \beta^0$  is the transition probability, values of  $W$  such that  $W^T \beta^0 = 0$  will not contribute to  
 178 the expectation as these types of transition occur with probability 0.

179 Take  $M_{\max} = c(T, d)/2$ . If  $\tilde{\Omega}(\beta - \beta^0) \leq M_{\max}$ ,  $|W_t^T(\beta - \beta^0)| \leq M_{\max}$ . Then by As-  
 180 sumption 2, we can regard  $\mathcal{F}$  as a class of  $[\log(c(T, d)/2), -\log(c(T, d)/2)]$ -valued functions  
 181 for some function  $c$  that only depends on the sample size  $T$  and the number of time series  
 182  $d$ . Hence we rescale it by multiplying  $c(T, d)/2$ , and denote the new class by  $\tilde{\mathcal{F}}$  so that  $\tilde{\mathcal{F}}$  is  
 183 bounded by 1 and is Lipschitz-continuous with Lipschitz constant 1.

184 We use the notion of sequential Rademacher complexity and covering number developed  
 185 in [SM9], which generalizes the definition of Rademacher complexity and covering number to  
 186 the setting of dependent samples. For a general function class  $\mathcal{G}$  mapping from  $\mathcal{Z}$  to  $\mathbb{R}$ , its  
 187 sequential Rademacher complexity is defined as

$$188 \quad (\text{SM3.6}) \quad \mathcal{R}_n = \sup_{\mathbf{z}} \mathcal{R}_n(\mathcal{G}, \mathbf{z}), \quad \text{where } \mathcal{R}_n(\mathcal{G}, \mathbf{z}) = \mathbb{E} \left[ \sup_{g \in \mathcal{G}} \frac{1}{T} \sum_{t=1}^T \epsilon_t g(\mathbf{z}_t(\epsilon)) \right],$$

189 where  $(\epsilon_t)_{t=1}^T$  is a sequence of independent Rademacher random variables, i.e., Uniform  $\{-1, 1\}$   
 190 and  $\mathbf{z}$  is a  $\mathcal{Z}$ -valued tree of depth  $T$ . Further, define

$$191 \quad (\text{SM3.7}) \quad \mathcal{D}_n(\mathcal{G}) = \sup_{\mathbf{z}} \mathcal{D}_n(\mathcal{G}, \mathbf{z}), \quad \text{where } \mathcal{D}_n(\mathcal{G}, \mathbf{z}) = \inf_{\alpha} \left\{ 4\alpha + 12/\sqrt{T} \int_{\alpha}^1 \sqrt{\log \mathcal{N}_2(\delta, \mathcal{G}, \mathbf{z})} d\delta \right\},$$

192 and  $\mathcal{N}_2(\cdot, \mathcal{G}, \mathbf{z})$  is the  $l_2$  covering number of  $\mathcal{G}$  over a tree  $\mathbf{z}$  of depth  $T$ . See [SM9] for a  
 193 complete introduction to sequential Rademacher complexities and covering numbers.

194 By Theorem 2 and Theorem 4 in [SM9] we can bound the expectation by the sequential  
 195 Rademacher complexity and a Dudley-type entropy integral,

$$196 \quad (\text{SM3.8}) \quad \mathbb{E} \left[ \sup_{f \in \tilde{\mathcal{F}}} |M_n(f)| \right] = \mathbb{E} \left[ \sup_{f \in \tilde{\mathcal{F}} \cup -\tilde{\mathcal{F}}} M_n(f) \right] \leq 2\mathcal{R}_n(\tilde{\mathcal{F}} \cup -\tilde{\mathcal{F}}) \leq 2\mathcal{D}_n(\tilde{\mathcal{F}} \cup -\tilde{\mathcal{F}}).$$

197 We note that since  $\beta^0$  is fixed, the covering number of  $\tilde{\mathcal{F}}$  is the same as that of  $\mathcal{G} = \{g(\cdot) : g(W_t) = \log(W_t^T \beta), \tilde{\Omega}(\beta - \beta^0) \leq M\}$ . Using the same arguments as in Lemma 13 of [SM9],  
 198 we can show that  
 199

$$200 \quad (\text{SM3.9}) \quad \log \mathcal{N}_2(\delta, \tilde{\mathcal{F}}, \mathbf{z}) = \log \mathcal{N}_2(\delta, \mathcal{G}, \mathbf{z}) \leq \log \mathcal{N}_{\infty}(\delta, \mathcal{H}, \mathbf{z}),$$

201 where  $\mathcal{H} = \{h : h(W_t) = W_t^T \beta - W_t^T \beta^0, \tilde{\Omega}(\beta - \beta^0) \leq M\}$ . Hence we have that

$$\begin{aligned} 202 \quad \mathcal{D}_n(\tilde{\mathcal{F}} \cup -\tilde{\mathcal{F}}) &= \sup_{\mathbf{z}} \inf_{\alpha} \left\{ 4\alpha + 12/\sqrt{T} \int_{\alpha}^1 \sqrt{\log \mathcal{N}_2(\delta, \tilde{\mathcal{F}} \cup -\tilde{\mathcal{F}}, \mathbf{z})} d\delta \right\} \\ 203 \quad &\leq \sup_{\mathbf{z}} \inf_{\alpha} \left\{ 4\alpha + 12/\sqrt{T} \int_{\alpha}^1 \sqrt{\log \mathcal{N}_{\infty}(\delta, \mathcal{H} \cup -\mathcal{H}, \mathbf{z})} d\delta \right\} \\ 204 \quad (\text{SM3.10}) \quad &= \mathcal{D}_n^{\infty}(\mathcal{H} \cup -\mathcal{H}). \end{aligned}$$

206 Applying Lemma 9 in [SM9], we then get

$$207 \quad (\text{SM3.11}) \quad \mathcal{D}_n^\infty(\mathcal{H} \cup -\mathcal{H}) \leq 8\mathcal{R}_n(\mathcal{H} \cup -\mathcal{H}) \left(1 + 4\sqrt{2} \log^{3/2}(eT^2)\right).$$

208 Our last step is to bound the Rademacher complexity of the class  $\mathcal{H} \cup -\mathcal{H}$ . Note that by  
209 definition,

$$\begin{aligned} 210 \quad \mathcal{R}_n(\mathcal{H} \cup -\mathcal{H}) &= \sup_{\mathbf{w}} \mathbb{E} \left[ \sup_{h \in \mathcal{H}} \left| \frac{1}{T} \sum_{t=1}^T \epsilon_t h(\mathbf{w}_t(\epsilon)) \right| \right] \\ 211 \quad &= \sup_{\mathbf{w}} \mathbb{E} \left[ \sup_{\beta: \tilde{\Omega}(\beta - \beta^0) \leq M} \left| \frac{1}{T} \sum_{t=1}^T \epsilon_t \mathbf{w}_t(\epsilon)^T (\beta - \beta^0) \right| \right] \\ 212 \quad &\leq \sup_{\mathbf{w}} \mathbb{E} \left[ \left\| \frac{1}{T} \sum_{t=1}^T \epsilon_t \mathbf{w}_t(\epsilon) \right\|_\infty \right] \sup_{\beta: \tilde{\Omega}(\beta - \beta^0) \leq M} \|\beta - \beta^0\|_1 \\ 213 \quad &\leq mM \sup_{\mathbf{w}} \mathbb{E} \left[ \max_{j \in \{1, \dots, m+dm^2\}} \left| \frac{1}{T} \sum_{t=1}^T \epsilon_t \mathbf{w}_{tj}(\epsilon) \right| \right] \\ 214 \quad (\text{SM3.12}) \quad &\leq mM \sqrt{\frac{2 \log(2(m + dm^2))}{T}} \\ 215 \end{aligned}$$

216 where the fourth line follows from Lemma SM3.1 and the fifth line follows by applying the  
217 finite class lemma in the dependent setting [SM9] and a union bound.

218

219 Finally, combining (SM3.8), (SM3.10), (SM3.11) and (SM3.12), we have that

$$220 \quad (\text{SM3.13}) \quad \mathbb{E} \left[ \sup_{f \in \mathcal{F}} |M_n(f)| \right] \leq \frac{32}{c(T, d)} mM \sqrt{\frac{2 \log(2(m + dm^2))}{T}} \left(1 + 4\sqrt{2} \log^{3/2}(eT^2)\right).$$

221 Thus, by Markov inequality, we can take

$$222 \quad (\text{SM3.14}) \quad \lambda_\epsilon = O_p \left( \frac{1}{c(T, d)} \sqrt{\frac{\log(d) \log^3(T)}{T}} \right).$$

223 Finally, we need

$$224 \quad (\text{SM3.15}) \quad \frac{32\lambda_\epsilon(1 + \delta)^2 |S|}{\delta^2 \phi^2(1/(1 - \delta), S, \tau)} \leq \frac{1}{2} c(T, d),$$

225 which holds with probability tending to 1 by Assumption 2 and Assumption 3.

226 **SM3.2. Useful lemmas.** Before proving our main theorem, we first establish several lem-  
227 mas which will be useful later in the proof.

228

229 The first lemma establishes a margin condition for the negative loglikelihood loss.

230 **Lemma SM3.1.** (*Margin condition*) For all  $\beta$  satisfying the MTD model constraints,  $R(\beta) -$   
 231  $R(\beta^0) \geq \frac{1}{2} \tilde{\tau}^2(\beta - \beta^0)$ , where  $\tilde{\tau}(\beta)$  is a semi-norm defined as

$$232 \quad (\text{SM3.16}) \quad \tilde{\tau}(\beta) = \sqrt{\frac{1}{T} \beta^T \left( \sum_{t=1}^T \mathbb{E} [W_t W_t^T | \mathcal{A}_{t-1}] \right) \beta}.$$

233 *Proof.* As  $\beta^0$  is the true parameter in the conditional distribution specified by MTD model,  
 234 it maximizes  $\mathbb{E}[\log(W_t^T \beta) | \mathcal{A}_{t-1}]$  for all  $t$ , and hence minimizes  $R(\beta)$ . (The minimizer is not  
 235 unique, as in general the MTD model is not identifiable. But restricting each row to have at  
 236 least one zero can make the solution unique.)

237 Let  $H(\beta) = 0$  denote the set of equality constraints on a valid MTD parameter set. Then,  
 238 consider the Lagrangian form of the MTD optimization,

$$239 \quad (\text{SM3.17}) \quad R(\beta) + \lambda_1^T H(\beta) + \lambda_2^T (-\beta),$$

240 where  $\lambda_1$  and  $\lambda_2$  are the Lagrange multipliers associated with the equality and inequality  
 241 constraints respectively. Then  $\beta^0$  satisfies the following KKT conditions:

$$242 \quad (\text{SM3.18}) \quad \frac{\partial R(\beta)}{\partial \beta} \Big|_{\beta^0} + (\lambda_1^0)^T \frac{\partial H(\beta)}{\partial \beta} \Big|_{\beta^0} - \lambda_2^0 = 0;$$

$$243 \quad (\text{SM3.19}) \quad H(\beta^0) = 0;$$

$$244 \quad (\text{SM3.20}) \quad (\lambda_2^0)^T \beta^0 = 0;$$

$$245 \quad (\text{SM3.21}) \quad \lambda_2^0 \geq 0, \beta^0 \geq 0.$$

247 We define a new function

$$248 \quad (\text{SM3.22}) \quad \tilde{R}(\beta) = R(\beta) + (\lambda_1^0)^T H(\beta) + (\lambda_2^0)^T (-\beta).$$

249 Note that for all  $\beta$  satisfying the MTD model constraints,  $H(\beta) = 0$ . Thus,

$$250 \quad \tilde{R}(\beta) - \tilde{R}(\beta^0) = R(\beta) - R(\beta^0) + (\lambda_1^0)^T (H(\beta) - H(\beta^0)) + (\lambda_2^0)^T (\beta^0 - \beta)$$

$$251 \quad (\text{SM3.23}) \quad = R(\beta) - R(\beta^0) + (\lambda_2^0)^T (\beta^0 - \beta)$$

$$252 \quad (\text{SM3.24}) \quad = R(\beta) - R(\beta^0) - (\lambda_2^0)^T \beta,$$

254 where the last line follows from the KKT conditions. At the same time, using a first order  
 255 Taylor expansion and noting that the derivative of  $\tilde{R}(\beta)$  at  $\beta^0$  is 0, we get

$$256 \quad (\text{SM3.25}) \quad \tilde{R}(\beta) - \tilde{R}(\beta^0) = (\beta - \beta^0)^T \frac{\partial^2 \tilde{R}}{\partial \beta^2} \Big|_{\beta^*} (\beta - \beta^0) / 2,$$

257 for some  $\beta^*$  between  $\beta$  and  $\beta^0$ . Then, we have

$$258 \quad (\text{SM3.26}) \quad R(\beta) - R(\beta^0) = (\lambda_2^0)^T \beta + (\beta - \beta^0)^T \frac{\partial^2 \tilde{R}}{\partial \beta^2} \Big|_{\beta^*} (\beta - \beta^0) / 2.$$

259 Since the equality and inequality constraints are both linear,  $\partial^2 \tilde{R}/\partial\beta^2 = \partial^2 R/\partial\beta^2$  and we  
 260 have

$$261 \quad (\text{SM3.27}) \quad \frac{\partial^2 R}{\partial\beta^2} = \frac{1}{T} \sum_{t=1}^T \mathbb{E} \left[ \frac{1}{(W_t^T \beta)^2} W_t W_t^T | \mathcal{A}_{t-1} \right].$$

262 Here,  $W_t^T \beta$  models conditional probability, and is bounded between 0 and 1. Hence the above  
 263 expression is lower bounded by  $\sum_{t=1}^T \mathbb{E}[W_t W_t^T | \mathcal{A}_{t-1}]/T$ . Also, we have that  $(\lambda_2^0)^T \beta \geq 0$ .  
 264 Together, we have

$$265 \quad (\text{SM3.28}) \quad R(\beta) - R(\beta^0) \geq \frac{1}{2} (\beta - \beta^0)^T \frac{\sum_{t=1}^T \mathbb{E}[W_t W_t^T | \mathcal{A}_{t-1}]}{T} (\beta - \beta^0). \quad \blacksquare$$

266 Recall that  $S$  denotes the active set of  $\beta^0$ , i.e.,  $S = \{j : j > 0, \beta_j^0 \neq 0\}$  and  $S^c$  denotes its  
 267 complement in  $\{1, \dots, d\}$ . We define  $\Omega^+(\beta) = \sum_{j \in S} \|\beta_j\|_1$  and  $\Omega^-(\beta) = \sum_{j \in S^c} \|\beta_j\|_1$ . The  
 268 next lemma shows some basic properties of the penalty  $\Omega(\cdot)$ .

269 **Lemma SM3.2.** (*Properties of the penalty*) *The penalty  $\Omega(\cdot)$  satisfies the following for any*  
 270  *$\beta$ :*

- 271 1.  $\|\beta\|_1 \leq \|\beta_0\|_1 + m\Omega(\beta)$ .
- 272 2.  $\Omega(\beta^0) - \Omega(\beta) \leq \Omega^+(\beta - \beta^0) - \Omega^-(\beta - \beta^0)$ .

273 *Proof.* 1.  $\|\beta\|_1 = \sum_{j=0}^d \|\beta_j\|_1$ . For  $j \neq 0, \beta_j \in \mathbb{R}^{m^2}$ . By Lyapunov inequality  
 274  $\frac{1}{m^2} \|\beta_j\|_1 \leq \sqrt{\frac{1}{m^2} \|\beta_j\|_2^2}$ , and hence  $\|\beta_j\|_1 \leq m \|\beta_j\|_2$ . Invoking the definition of  $\Omega(\beta)$   
 275 completes the proof.

276 2. We note that  $\Omega(\beta) = \Omega^+(\beta) + \Omega^-(\beta)$ . By the triangle inequality,  $\|\beta_j^0\|_1 \leq \|\beta_j^0 - \beta_j\|_1 +$   
 277  $\|\beta_j\|_1$ . Summing over  $j \in S$  we have  $\Omega^+(\beta^0) - \Omega^+(\beta) \leq \Omega^+(\beta^0 - \beta)$ . By definition  
 278  $\Omega^-(\beta^0) = 0$  and  $\beta_j - \beta_j^0 = \beta_j$  for  $j \in S^c$ , which implies that  $\Omega^-(\beta - \beta^0) = \Omega^-(\beta)$ .  
 279 Thus,

$$280 \quad \Omega(\beta^0) - \Omega(\beta) = \Omega^+(\beta^0) - \Omega^+(\beta) - \Omega^-(\beta)$$

$$281 \quad (\text{SM3.29}) \quad \leq \Omega^+(\beta - \beta^0) - \Omega^-(\beta) = \Omega^+(\beta - \beta^0) - \Omega^-(\beta - \beta^0). \quad \blacksquare$$

283 Recall that we have defined a semi-norm  $\tilde{\tau}(\beta) = \sqrt{\beta^T \sum_{t=1}^T \mathbb{E}[W_t W_t^T | \mathcal{A}_{t-1}] \beta}/T$ . However,  
 284 this semi-norm itself is random as we condition on the past. The next lemma shows that it is  
 285 close to a deterministic semi-norm  $\tau(\cdot)$ , and the compatibility constants defined with  $\tilde{\tau}$  and  $\tau$   
 286 are close. To this end, we will use concentration inequalities for Markov chains developed in  
 287 [SM8].

288 **Lemma SM3.3.** *Under Assumption 1 and Assumption 4, with probability at least  $1 - 1/T$ ,*

$$289 \quad (\text{SM3.30}) \quad \frac{\phi^2(L, S, \tilde{\tau})}{\phi^2(L, S, \tau)} \geq 1 - (1 + (1 + L)m)^2 C' \sqrt{\frac{\log(2(m + dm^2)^2) + \log(T)}{T\gamma_{ps}}} |S| / \phi^2(L, S, \tau).$$

290 Thus, under Assumptions 1, 3 and 4, for  $T$  sufficiently large,  $\phi^2(L, S, \tilde{\tau})/\phi^2(L, S, \tau) > 1/2$   
 291 with probability at least  $1 - 1/T$ .



292 *Proof.* For any  $j, k \in \{1, \dots, m + dm^2\}$ ,  $W_j W_k$  is bounded between 0 and 1. For simplicity,  
 293 we will assume, for now, that  $x_0 \sim \pi$ , i.e., the chain starts in the stationary distribution. We  
 294 will relax this assumption later. Applying Theorem 3.11 in [SM8],

(SM3.31)

$$295 \quad \mathbb{P} \left( \left| \frac{1}{T} \sum_{t=1}^T \mathbb{E}[W_{tj} W_{tk} | \mathcal{A}_{t-1}] - \mathbb{E}_\pi[W_{1j} W_{1k}] \right| \geq t \right) \leq 2 \exp \left( - \frac{T^2 t^2 \gamma_{ps}}{8(T + 1/\gamma_{ps}) + 20Tt} \right).$$

296 And, using a union bound,

297

$$298 \quad (\text{SM3.32}) \quad \mathbb{P} \left( \sup_{j,k} \left| \frac{1}{T} \sum_{t=1}^T \mathbb{E}[W_{tj} W_{tk} | \mathcal{A}_{t-1}] - \mathbb{E}[W_{1j} W_{1k}] \right| \geq t \right) \leq$$

$$299 \quad 2(m + dm^2)^2 \exp \left( - \frac{T^2 t^2 \gamma_{ps}}{8(T + 1/\gamma_{ps}) + 20Tt} \right).$$

300

301 In order to obtain a concentration bound, we will choose  $t = o(1)$  and consider large  $T$ .  
 302 Hence, the right-hand-side is of the same order as  $2(m + dm^2)^2 \exp(-CTt^2\gamma_{ps})$ , provided that  
 303  $1/\gamma_{ps} = o(T)$ . Now setting  $t = \sqrt{\log(2(m + dm^2)^2/\alpha)/CT\gamma_{ps}}$ ,

$$304 \quad (\text{SM3.33}) \quad \mathbb{P} \left( \max_{j,k} \left| \frac{1}{T} \sum_{t=1}^T \mathbb{E}[W_{tj} W_{tk} | \mathcal{A}_{t-1}] - \mathbb{E}[W_{1j} W_{1k}] \right| \geq \sqrt{\frac{\log(2(m + dm^2)^2/\alpha)}{CT\gamma_{ps}}} \right) \leq \alpha,$$

305 for  $T$  sufficiently large.

306 Then, for all  $\beta$

$$307 \quad |\tau^2(\beta) - \tilde{\tau}^2(\beta)| = \left| \beta^T \left( \frac{1}{T} \sum_{t=1}^T \mathbb{E}[W_t W_t^T | \mathcal{A}_{t-1}] - \mathbb{E}_\pi[W_1 W_1^T] \right) \beta \right|$$

$$308 \quad \leq \|\beta\|_1^2 \left\| \frac{1}{T} \sum_{t=1}^T \mathbb{E}[W_t W_t^T | \mathcal{A}_{t-1}] - \mathbb{E}_\pi[W_1 W_1^T] \right\|_\infty$$

$$309 \quad (\text{SM3.34}) \quad \leq \|\beta\|_1^2 C' \sqrt{\frac{\log(2(m + dm^2)^2/\alpha)}{T\gamma_{ps}}},$$

310

311 where by (SM3.33) the last line holds with probability at least  $1 - \alpha$ .

312 Recall the definition of  $\Gamma$  and compatibility constant  $\phi$ ,

$$313 \quad (\text{SM3.35}) \quad \Gamma_\Omega(L, S, \tau) = (\min \{ \tau(\beta) : \|\beta_0\|_1 + \Omega^+(\beta) = 1, \Omega^-(\beta) \leq L \})^{-1}$$

$$314 \quad (\text{SM3.36}) \quad \phi^2(L, S, \tau) = \Gamma_\Omega^{-2}(L, S, \tau) |S|.$$

316 Thus,

$$317 \quad \frac{\phi^2(L, S, \tilde{\tau})}{\phi^2(L, S, \tau)} = \frac{\Gamma_\Omega^2(L, S, \tau)}{\Gamma_\Omega^2(L, S, \tilde{\tau})} = \frac{\min \tilde{\tau}^2(\beta)}{\min \tau^2(\beta)} \geq 1 + \frac{\min \tilde{\tau}^2(\beta) - \min \tau^2(\beta)}{\min \tau^2(\beta)}$$

$$318 \quad (\text{SM3.37}) \quad \geq 1 - (1 + (1 + L)m)^2 C' \sqrt{\frac{\log(2(m + dm^2)^2/\alpha)}{T\gamma_{ps}}} |S| / \phi^2(L, S, \tau),$$

319

320 with probability at least  $1 - \alpha$ . Setting  $\alpha = 1/T$ , we see that with probability approaching 1,  
 321 the ratio is greater than  $\frac{1}{2}$  for sufficiently large  $T$ , provided that  $|S|\sqrt{\log(d)/T}\gamma_{ps} = o(1)$  and  
 322  $\phi^2(L, S, \tau)$  is bounded away from 0.

323

324 If the chain does not start in stationary distribution, a result similar to (SM3.31) can be  
 325 established, provided that the distribution of  $x_0$  is not too far away from  $\pi$ . In the rest of this  
 326 subsection, we use  $\mathbb{P}_q$  to denote the probability under the case  $x_0 \sim q$ . Define

$$327 \quad (\text{SM3.38}) \quad N_q = \begin{cases} \mathbb{E}_\pi \left[ \left( \frac{q(x)}{\pi(x)} \right)^2 \right] & \text{if } q \text{ is absolutely continuous with respect to } \pi, \\ +\infty & \text{otherwise.} \end{cases}$$

328 Applying Proposition 3.15 in [SM8], we get

$$329 \quad \mathbb{P}_q \left( \left| \frac{1}{T} \sum_{t=1}^T \mathbb{E}[W_{tj}W_{tk} | \mathcal{A}_{t-1}] - \mathbb{E}_\pi[W_{1j}W_{1k}] \right| \geq t \right) \\
 330 \quad \leq N_q^{1/2} \left[ \mathbb{P} \left( \left| \frac{1}{T} \sum_{t=1}^T \mathbb{E}[W_{tj}W_{tk} | \mathcal{A}_{t-1}] - \mathbb{E}_\pi[W_{1j}W_{1k}] \right| \geq t \right) \right]^{1/2} \\
 331 \quad (\text{SM3.39}) \quad \leq 2N_q^{1/2} \exp \left( -\frac{T^2 t^2 \gamma_{ps}}{16(T + 1/\gamma_{ps}) + 40Tt} \right).$$

333 This bound is essentially the same as in (SM3.31), except that we are working with different  
 334 constants. The rest of the proof follows. ■

**SM3.3. Proof of Theorem 6.1.** Next we prove our main theorem, which is a modification of the proof of Theorem 7.2 in [SM10]. The difference is that we handle the unpenalized intercept as in [SM2] and we have time dependence in the data. For notational convenience, define

$$M = \frac{4\lambda(1 + \delta)^2 |S|}{\delta \phi^2(1/(1 - \delta), S, \tau)}, \text{ and } t = \frac{M}{M + \Omega(\hat{\beta} - \beta^0) + \|\hat{\beta}_0 - \beta_0^0\|_1}.$$

335 Define  $\tilde{\beta} = t\hat{\beta} + (1 - t)\beta^0$ . With this construction,  $\|\tilde{\beta}_0 - \beta_0^0\|_1 + \Omega(\tilde{\beta} - \beta^0) \leq M$ .

336 We note that although in general  $\tilde{\beta}$  may not have a zero in each row of the corresponding  
 337  $\mathbf{Z}^j$  matrices, and hence may not be identifiable, it does satisfy the equality and inequality  
 338 constraints of the MTD model. By the convexity of  $R_n + \lambda\Omega$ , we have that

$$339 \quad R_n(\tilde{\beta}) + \lambda\Omega(\tilde{\beta}) \leq tR_n(\hat{\beta}) + t\lambda\Omega(\hat{\beta}) + (1 - t)R_n(\beta^0) + (1 - t)\lambda\Omega(\beta^0) \\
 340 \quad (\text{SM3.40}) \quad \leq R_n(\beta^0) + \lambda\Omega(\beta^0).$$

342 We rewrite this and apply Lemma 6.2 and Lemma SM3.2,

$$343 \quad 0 \leq R(\tilde{\beta}) - R(\beta^0) \leq - \left[ [R_n(\tilde{\beta}) - R(\tilde{\beta})] - [R_n(\beta^0) - R(\beta^0)] \right] + \lambda\Omega(\beta^0) - \lambda\Omega(\tilde{\beta}) \\
 344 \quad \leq \lambda_\epsilon M + \lambda\Omega(\beta^0) - \lambda\Omega(\tilde{\beta}) \\
 345 \quad (\text{SM3.41}) \quad \leq \lambda_\epsilon M + \lambda\Omega^+(\tilde{\beta} - \beta^0) - \lambda\Omega^-(\tilde{\beta} - \beta^0).$$

347 We consider two cases.

348 • Case 1: If  $\lambda\|\tilde{\beta}_0 - \beta_0^0\|_1 + \lambda\Omega^+(\tilde{\beta} - \beta^0) \leq (1 - \delta)\lambda_\epsilon M/\delta$ , we have that

349 (SM3.42) 
$$\delta\lambda\left(\|\tilde{\beta}_0 - \beta_0^0\|_1 + \Omega^+(\tilde{\beta} - \beta^0)\right) \leq \lambda_\epsilon M,$$

350 and

351 (SM3.43) 
$$\delta\lambda\Omega^-(\tilde{\beta} - \beta^0) \leq \lambda_\epsilon M.$$

352 Hence,

353 (SM3.44) 
$$\delta\lambda\left(\|\tilde{\beta}_0 - \beta_0^0\|_1 + \Omega(\tilde{\beta} - \beta^0)\right) \leq 2\lambda_\epsilon M.$$

354 • Case 2: If instead  $\lambda\|\tilde{\beta}_0 - \beta_0^0\|_1 + \lambda\Omega^+(\tilde{\beta} - \beta^0) \geq (1 - \delta)\lambda_\epsilon M/\delta$ , then by (SM3.41)

355 
$$R(\tilde{\beta}) - R(\beta^0) + \lambda\Omega^-(\tilde{\beta} - \beta^0) \leq \lambda\Omega^+(\tilde{\beta} - \beta^0) + \frac{\delta}{(1 - \delta)}\lambda\left(\Omega^+(\tilde{\beta} - \beta^0) + \|\tilde{\beta}_0 - \beta_0^0\|_1\right)$$
  
 356 (SM3.45) 
$$\leq \lambda\left(\Omega^+(\tilde{\beta} - \beta^0) + \|\tilde{\beta}_0 - \beta_0^0\|_1\right)/(1 - \delta),$$
  
 357

358 where the second inequality holds because  $0 < \delta < 1$ . Since  $R(\tilde{\beta}) - R(\beta^0) \geq 0$ ,

359 (SM3.46) 
$$\Omega^-(\tilde{\beta} - \beta^0) \leq \left(\Omega^+(\tilde{\beta} - \beta^0) + \|\tilde{\beta}_0 - \beta_0^0\|_1\right)/(1 - \delta),$$

360 which allows us to use the compatibility condition later. Again from (SM3.41),

361 
$$R(\tilde{\beta}) - R(\beta) + \lambda\Omega^-(\tilde{\beta} - \beta^0) + \delta\lambda\left(\Omega^+(\tilde{\beta} - \beta^0) + \|\tilde{\beta}_0 - \beta_0^0\|_1\right)$$
  
 362 
$$\leq \lambda_\epsilon M + (1 + \delta)\lambda\left(\Omega^+(\tilde{\beta} - \beta^0) + \|\tilde{\beta}_0 - \beta_0^0\|_1\right)$$
  
 363 
$$\leq \lambda(1 + \delta)\tilde{\tau}(\tilde{\beta} - \beta^0)\Gamma_\Omega(1/(1 - \delta), S, \tilde{\tau}) + \lambda_\epsilon M$$
  
 364 
$$\leq \frac{1}{2}(\lambda^2(1 + \delta)^2\Gamma_\Omega^2(1/(1 - \delta), S, \tilde{\tau})) + \frac{1}{2}\tilde{\tau}^2(\tilde{\beta} - \beta^0) + \lambda_\epsilon M$$
  
 365 (SM3.47) 
$$\leq \frac{1}{2}(\lambda^2(1 + \delta)^2\Gamma_\Omega^2(1/(1 - \delta), S, \tilde{\tau})) + R(\tilde{\beta}) - R(\beta) + \lambda_\epsilon M,$$
  
 366

367 where the second inequality follows by applying Assumption 3 with stretching factor  
 368  $1/(1 - \delta)$ , and the fourth inequality follows from Lemma SM3.1. It follows that

369 
$$\delta\lambda\left(\Omega(\tilde{\beta} - \beta^0) + \|\tilde{\beta}_0 - \beta_0^0\|_1\right) \leq \frac{1}{2}(\lambda(1 + \delta)\Gamma_\Omega(1/(1 - \delta), S, \tilde{\tau}))^2 + \lambda_\epsilon M$$
  
 370 
$$= \frac{1}{2}(\lambda(1 + \delta))^2 \frac{|S|}{\phi^2(L, S, \tilde{\tau})} + \lambda_\epsilon M$$
  
 371 (SM3.48) 
$$\leq \frac{(\lambda(1 + \delta))^2 |S|}{\phi^2(L, S, \tau)} + \lambda_\epsilon M,$$
  
 372

373 with probability approaching 1.

374 Hence, in both cases we have that with probability going to 1,

$$375 \quad \delta\lambda \left( \Omega(\tilde{\beta} - \beta^0) + \|\tilde{\beta}_0 - \beta_0^0\|_1 \right) \leq 2\lambda_\epsilon M + (\lambda(1 + \delta)\Gamma_\Omega(1/(1 - \delta), \mathcal{S}, \tau))^2$$

$$376 \quad (\text{SM3.49}) \quad \quad \quad = \delta\lambda M/4 + 2\lambda_\epsilon M \leq \delta\lambda M/2,$$

378 where the inequality follows from the fact that  $\lambda \geq 8\lambda_\epsilon/\delta$  and the equality follows from the  
379 definition of  $M$ . Finally, this implies that

$$380 \quad (\text{SM3.50}) \quad \quad \quad \Omega(\tilde{\beta} - \beta^0) + \|\tilde{\beta}_0 - \beta_0^0\|_1 \leq M/2,$$

381 which in turn, by the construction of  $\tilde{\beta}$ , implies that

$$382 \quad (\text{SM3.51}) \quad \quad \quad \Omega(\hat{\beta} - \beta^0) + \|\hat{\beta}_0 - \beta_0^0\|_1 \leq M.$$

383 **SM4. Optimization Algorithms.** In the main text, we presented a projected gradient  
384 algorithm for optimization. Here, we present some alternative methods for optimization of  
385 the MTD objective and discuss in what contexts they might be applicable.

386 **SM5. Frank-Wolfe.** In very high-dimensional settings, with large state spaces, the pro-  
387 jection step in the MTD projected gradient algorithm presented in the main text becomes  
388 increasingly more computationally intensive. Frank-Wolfe algorithms, on the other hand, are  
389 projection free algorithms for solving constrained convex optimization problems and have re-  
390 cently gained popularity due to their simplicity and scalability in sparse, high-dimensional  
391 regression and machine learning [SM4]. Fortunately, the Frank-Wolfe algorithm for MTD also  
392 takes a simple form that allows updating only a small number of parameters at a time. In very  
393 sparse, high dimensional problems with large state spaces, where most entries are zero, this is  
394 typically advantageous [SM4]. We develop the algorithm and provide a timing comparison to  
395 the projected gradient algorithm in the main text. We leave the development of Frank-Wolfe  
396 using various variants [SM5] for future work.

397 **SM5.1. Frank-Wolfe MTD.** Let  $\mathbf{Z}^{(0)}$  be the initial MTD model. Let  $L(\mathbf{Z}) = L_{MTD}(\mathbf{Z}) +$   
398  $\lambda\Omega(\mathbf{Z})$ . The Frank-Wolfe algorithm iterates between the following steps starting with  $k = 0$ :

399 1. Find a direction  $\hat{\mathbf{D}}$  that maximizes the dot product with the gradient while staying in  
400 the constraint set:

$$401 \quad (\text{SM5.1}) \quad \hat{\mathbf{D}} = \underset{\mathbf{D}}{\operatorname{argmin}} (\mathbf{z}^0)^T \nabla_{\mathbf{z}^0} L(\mathbf{Z}^{(k)}) + \sum_{j=1} \operatorname{trace} \left( (\mathbf{D}^j)^T \nabla_{\mathbf{z}^j} L(\mathbf{Z}^{(k)}) \right)$$

402

403

$$404 \quad \text{subject to } \mathbf{1}^T \mathbf{D}^j = \gamma_j \mathbf{1}^T, \quad \mathbf{D}^j \geq 0 \quad \forall j, \quad \mathbf{1}^T \boldsymbol{\gamma} = 1, \gamma \geq 0.$$

406 2. Choose  $\theta$  by line search or set  $\theta = \frac{2}{2+k}$ .

407 3. Set  $\mathbf{Z}^{(k+1)} = \theta \hat{\mathbf{D}} + (1 - \theta) \mathbf{Z}^{(k)}$ .

408 Step 1 involves solving a linear programming problem. Since the solution to Step 1 stays  
409 in the constraint set, any step taken in Step 2 for  $\theta \in (0, 1)$  remains in the constraint set.  
410 Fortunately, the linear program in Step 1 has a simple, closed form solution with linear  
411 complexity in the number of parameters,  $O(m^2 d + m)$ .

412 Proposition SM5.1. First let  $\mathbf{F}^j = \nabla_{\mathbf{Z}^j} L(\mathbf{Z}^{(k)})$ . Let  $q_k^j$  be the row index of the minimal  
 413 element in column  $k$  of  $\mathbf{F}_{:,k}^j$  and let  $s^j$  be the sum of the minimal elements in each column:  
 414  $s^j = \sum_{k=1}^m \mathbf{Z}_{q_k^j}^j$ . Furthermore, let  $j^*$  be the index of the minimum  $s^j : j^* = \underset{j}{\operatorname{argmin}}(s^j)$ .  
 415 Then  $\mathbf{D}^*$  is given by

$$\begin{aligned} \hat{\mathbf{D}}^j &= 0 \quad \forall j \neq j^*, \\ \hat{\mathbf{D}}_{lk}^{j^*} &= \begin{cases} 1 & \text{if } l = q_k^{j^*} \\ 0 & \text{if } l \neq q_k^{j^*} \end{cases}. \end{aligned}$$

418 Intuitively, to stay in the MTD constraint set any feasible step must place equal mass on each  
 419 column of a  $\mathbf{Z}^j$ , and that the minima is attained by only taking steps in the direction of  $\mathbf{Z}^j$   
 420 with a minimal sum of columnwise minima.

421 Proposition SM5.1 implies that if the model is initialized with  $(\mathbf{Z}^j)^{(0)} = 0$  for all  $j$ , then at  
 422 step  $k$  at most only  $km$  entries in  $\mathbf{Z}^{(k)}$  will be nonzero, and typically less in high-dimensional  
 423 sparse settings since certain entries with strong signal will be updated repeatedly. The final  
 424 Frank-Wolfe algorithm for MTD is shown in Algorithm SM5.1.

425 *Proof of Proposition SM5.1.* We study the KKT conditions. The Lagrangian is given by:

$$\sum_j \sum_l \sum_k \mathbf{D}_{lk}^j \mathbf{F}_{lk}^j + \sum_j \sum_k \lambda_k^j \left( \left( \sum_l \mathbf{D}_{lk}^j \right) - \gamma_j \right) + \nu (1^T \gamma - 1) + \sum_j \sum_k \sum_l \phi_{lk}^j \mathbf{D}_{lk}^j.$$

428 So that the KKT conditions for an optima are given by:

$$(SM5.2) \quad \mathbf{F}_{lk}^j = \lambda_k^j + \gamma_{lk}^j;$$

$$(SM5.3) \quad \sum_k \lambda_k^j = \nu \quad \forall j;$$

$$(SM5.4) \quad \phi_{lk}^j \geq 0 \quad (\text{dual feasibility});$$

$$(SM5.5) \quad \phi_{lk}^j \hat{\mathbf{D}}_{lk}^j = 0 \quad (\text{complimentary slackness}).$$

434 We show that for the primary feasible solution given in Proposition SM5.1, there exists a  
 435 set of dual variables that obey the KKT conditions, showing that the solution in Proposition  
 436 SM5.1 is indeed the global optima.

437 For the primal solution given in Proposition SM5.1, let the dual variables for  $j^*$  be

$$\lambda_k^{j^*} = \mathbf{F}_{q_k^{j^*}}^{j^*} \quad \text{and} \quad \phi_{q_k^{j^*} k}^{j^*} = 0 \quad \forall k \in (1, \dots, m_j),$$

440 which obeys (SM5.2) and the complimentary slackness in (SM5.5) since  $\hat{\mathbf{D}}_{q_k^{j^*} k}^{j^*} = 1$ . For all  
 441 other entries of  $\hat{\mathbf{D}}^{j^*}$ ,  $\phi_{lk}^{j^*} = F_{lk}^{j^*} - \lambda_k^{j^*} = F_{lk}^{j^*} - F_{q_k^{j^*} k}^{j^*}$ , so that all entries in  $\phi_{lk}^{j^*}$  and  $\lambda_k^{j^*}$  obey the  
 442 KKT conditions for all  $l, k$  in (SM5.4). The complimentary slackness holds in (SM5.5) since  
 443 for these  $l, k$   $\hat{\mathbf{D}}_{lk}^{j^*} = 0$ . Finally, set  $\nu = \sum_k \lambda_k^{j^*} = \sum_k F_{q_k^{j^*} k}^{j^*}$  which by construction satisfies  
 444 condition (SM5.3).

445 For  $j \neq j^*$ , let  $\lambda_k^j = F_{q_k^j k}^j - \frac{\tilde{\nu}^j - \nu}{m_j}$  where  $\tilde{\nu}^j = \sum_k^{m_j} F_{q_k^j k}^j$ . By construction,  $\sum_j^{m_j} \lambda_k^j = \nu$   
 446 satisfying (SM5.3). Furthermore, letting  $\phi_{lk}^j = F_{lk}^j - \lambda_k^j$ , we have that  $\phi_{lk}^j > 0$  since  $F_{lk}^j >$   
 447  $F_{q_k^j k}^j > F_{q_k^j k}^j - \frac{\tilde{\nu}^j - \nu}{m_j} = \lambda_k^j$  and  $\tilde{\nu}^j - \nu = \sum_k^{m_j} F_{q_k^j k}^j - \sum_k^{m_{j^*}} F_{q_k^{j^*} k}^{j^*} > 0$  satisfying (SM5.4). For all  
 448 these entries the complimentary slackness condition holds since  $\hat{\mathbf{D}}_{lk}^j = 0$ , satisfying (SM5.5).  
 449 Taken together, we have found a set of dual feasible points that obey the KKT conditions  
 450 for the solution in Proposition SM5.1, showing that the solution is the optima. ■

---

**Algorithm SM5.1** Projection free Frank-Wolfe algorithm for MTD.

---

```

Initialize  $(\mathbf{Z}^j)^{(0)} = 0 \quad \forall j, (\mathbf{z}^0)^{(0)} = \frac{1}{m}$ 
for  $k = 0, 1, 2, \dots$  do
  compute  $\nabla L(\mathbf{Z}^{(k)})$ 
  determine  $\hat{\mathbf{D}}$  according to Proposition SM5.1
  determine  $\theta$  by line search or  $\theta = \frac{2}{2+k}$ 
   $\mathbf{Z}^{(k)} = (1 - \theta)\mathbf{Z}^{(k+1)} + \theta\hat{\mathbf{D}}$ 
end for

```

---

451 **SM5.2. Run time comparison between Frank-Wolfe and Projected Gradient.** We com-  
 452 pare the Frank-Wolfe algorithm for MTD to the projected gradient algorithm in the main text.  
 453 In Figure SM11 we show the value of the objective as a function of time for Frank-Wolfe, pro-  
 454 jected gradient descent, and accelerated projected gradient descent on a synthetic data set.  
 455 For Frank-Wolfe, we use the step size of  $\theta = \frac{2}{2+k}$ . In this case, the Frank-Wolfe algorithm is  
 456 slower to converge than the projected or accelerated projected gradient algorithm. We suspect  
 457 that the gains of Frank-Wolfe over projected gradient will be in very high-dimensional settings  
 with large state spaces, but we leave that exploration for future work.

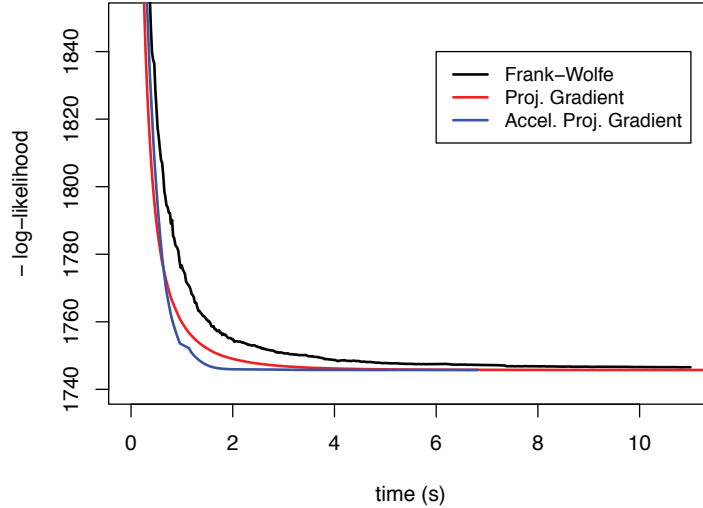

**Figure SM11.** Run time comparison between Frank-Wolfe, projected gradient, and accelerated projected gradient on a  $d = 25$ ,  $T = 400$ , and  $m = 5$  synthetic data set.

458 **SM5.3. Majorization-Minimization.** Here we use the convex formulation of MTD in the  
 459 main text to derive a majorization-minimization (MM) algorithm [SM3]. The closed form  
 460 updates are only given when there is no penalty function  $\Omega(\mathbf{Z})$ , so that this algorithm is  
 461 not as generally applicable as the projected gradient algorithm presented in the main text.  
 462 Interestingly, we find that the MM updates of the convex formulation correspond exactly  
 463 to the MTD EM algorithm of [SM6] for the non-convex parameterization. This proves that  
 464 the EM algorithm for MTD converges to a global optima even though the log-likelihood is  
 465 non-convex.

466 We derive the MM algorithm for the convex MTD formulation with no penalty term (and  
 467 no intercept):

$$(SM5.6) \quad \begin{aligned} & \underset{\mathbf{Z}, \gamma}{\text{minimize}} \quad L_{\text{MTD}}(\mathbf{Z}) \\ & \text{subject to} \quad \mathbf{1}^T \mathbf{Z}^j = \gamma_j \mathbf{1}^T, \mathbf{Z}^j \geq 0 \quad \forall j, \quad \mathbf{1}^T \gamma = 1, \gamma \geq 0. \end{aligned}$$

469 To derive the MM algorithm, we first form the surrogate function

$$470 \quad Q(\mathbf{Z}, \mathbf{Z}^{(n)}) = \sum_{t=1}^T \sum_{j=1}^d p_{jt} \log \frac{Z_{x_{it}x_{j(t-1)}}^j}{p_{jt}},$$

471  
 472 where  $p_{jt} = \frac{Z_{x_{it}x_{j(t-1)}}^{j(n)}}{\sum_{l=1}^d Z_{x_{it}x_{l(t-1)}}^{l(n)}}$ . Now,  $Q(\mathbf{Z}, \mathbf{Z}^{(n)})$  satisfies the MM algorithm conditions that  
 473  $Q(\mathbf{Z}, \mathbf{Z}^{(n)}) \geq L_{\text{MTD}}(\mathbf{Z})$  and  $Q(\mathbf{Z}, \mathbf{Z}) = L_{\text{MTD}}(\mathbf{Z})$ . This implies we may iteratively minimize  
 474  $Q(\mathbf{Z}, \mathbf{Z}^{(n)})$ :

$$475 \quad \mathbf{Z}^{(n+1)} = \underset{\mathbf{Z}, \gamma}{\text{argmin}} Q(\mathbf{Z}, \mathbf{Z}^{(n)}),$$

476  
 477 and that this sequence of  $\mathbf{Z}^{(n+1)}$  converges to a global optima since Problem (SM5.6) is convex.

478 **Proposition SM5.2.** *The solution to Problem (SM5.6) under the MTD constraints is given*  
 479 *in closed form:*

$$480 \quad (SM5.7) \quad \mathbf{z}_{lk}^{j(n+1)} = \left( \frac{\tilde{p}_{lk}^j}{\sum_l \tilde{p}_{lk}^j} \right) \left( \frac{\sum_{lk} \tilde{p}_{lk}^j}{\sum_j \sum_{lk} \tilde{p}_{lk}^j} \right),$$

481 where  $\tilde{p}_{lk}^j = \sum_{t=1}^T p_{jt} \mathbf{1}_{(x_{it}=l, x_{j(t-1)}=k)}$ .

482 **Corollary SM5.3.** *The EM algorithm for the unpenalized MTD model in the original  $(\gamma, \mathbf{P})$*   
 483 *parameterization converges to a global optima of the non-convex log-likelihood.*

484 **Proof of Proposition SM5.2 and Corollary SM5.3.** The optimization problem for the MM  
 485 update in Problem (SM5.6) is given by

$$486 \quad (SM5.8) \quad \underset{\mathbf{Z}, \gamma}{\text{minimize}} - \sum_{t=1}^T \sum_{j=1}^d p_{jt} \log \frac{Z_{x_{it}x_{j(t-1)}}^j}{p_{jt}}$$

487

488

$$\text{subject to } \mathbf{1}^T \mathbf{Z}^j = \gamma_j \mathbf{1}^T \quad \forall j, \quad \mathbf{1}^T \boldsymbol{\gamma} = 1,$$

490 where we have removed the non-negativity constraints because these are automatically en-  
491 forced in the log terms of the  $Q(Z, Z^{(n)})$  objective. We may first rewrite the objective in  
492 (SM5.8) equivalently as

493 (SM5.9)

$$\text{minimize}_{\mathbf{Z}, \boldsymbol{\gamma}} - \sum_{j=1}^d \sum_{l=1}^m \sum_{k=1}^m \tilde{p}_{lk}^j \log Z_{lk}^j$$

494

495

$$\text{subject to } \mathbf{1}^T \mathbf{Z}^j = \gamma_j \mathbf{1}^T \quad \forall j, \quad \mathbf{1}^T \boldsymbol{\gamma} = 1,$$

497 where  $\tilde{p}_{lk}^j = \sum_{t=1}^m p_{jt} \mathbf{1}_{(x_{it}=l, x_{j(t-1)}=k)}$ . We derive the solution by solving the KKT conditions.  
498 The Lagrangian of (SM5.9) is given by

499

500

$$\sum_{j=1}^d \sum_{l=1}^m \sum_{k=1}^m \tilde{p}_{lk}^j \log Z_{lk}^j + \sum_j \sum_k \lambda_k^j \left( \left( \sum_l Z_{lk}^j \right) - \gamma_j \right) + \nu (\mathbf{1}^T \boldsymbol{\gamma} - 1),$$

501 where  $\lambda_k^j$  and  $\nu$  are Lagrange multipliers. The solution must satisfy the KKT conditions:  
502 [SM1]

503 (SM5.10)

$$Z_{lk}^j = \frac{\tilde{p}_{lk}^j}{\lambda_k^j} \quad \forall j, l, k,$$

504 (SM5.11)

$$\nu = \sum_k \lambda_k^j \quad \forall j,$$

505 (SM5.12)

$$\mathbf{1}^T \mathbf{Z}^j = \gamma_j \mathbf{1}^T \quad \forall j, \quad \mathbf{1}^T \boldsymbol{\gamma} = 1.$$

507 Summing over Equation (SM5.10) for all rows  $l$  gives

508

509

$$\gamma_j = \frac{\sum_l \tilde{p}_{lk}^j}{\lambda_k^j}.$$

510 Re-arranging and summing over  $k$  gives

511

512

$$\frac{\sum_{lk} \tilde{p}_{lk}^j}{\gamma_j} = \sum_k \lambda_k^j = \nu,$$

513 and finally re-arranging once more and summing over  $j$  gives

514

515

$$\frac{\sum_j \sum_{lk} \tilde{p}_{lk}^j}{\nu} = \sum_j \gamma_j = 1.$$



516 Plugging these results back into those above implies that  $\nu = \sum_j \sum_{lk} \tilde{p}_{lk}^j$ ,  $\gamma_j = \frac{\sum_{lk} \tilde{p}_{lk}^j}{\sum_j \sum_{lk} \tilde{p}_{lk}^j}$ ,  
 517  $\lambda_k^j = \frac{(\sum_l \tilde{p}_{lk}^j)(\sum_j \sum_{lk} \tilde{p}_{lk}^j)}{\sum_{lk} \tilde{p}_{lk}^j}$ . Plugging into Equation (SM5.10) gives the final update for  $\mathbf{Z}^{(n+1)}$   
 518 as

$$519 \quad (\text{SM5.13}) \quad Z_{lk}^{j(n+1)} = \left( \frac{\tilde{p}_{lk}^j}{\sum_l \tilde{p}_{lk}^j} \right) \left( \frac{\sum_{lk} \tilde{p}_{lk}^j}{\sum_j \sum_{lk} \tilde{p}_{lk}^j} \right)$$

$$520 \quad (\text{SM5.14}) \quad = P_{lk}^{j(n+1)} \gamma_j^{(n+1)},$$

522 where  $P_{lk}^{j(n+1)} = \left( \frac{\sum_{lk} \tilde{p}_{lk}^j}{\sum_j \sum_{lk} \tilde{p}_{lk}^j} \right)$  and  $\gamma_j^{(n+1)} = \left( \frac{\tilde{p}_{lk}^j}{\sum_l \tilde{p}_{lk}^j} \right)$ .

523 This update for  $P_{lk}^{j(n+1)}$  and  $\gamma_j^{(n+1)}$  is identical to the updates for the EM algorithm in  
 524 the original  $(\mathbf{P}, \gamma)$  parameterization [SM6]. Since the MM algorithm on a convex problem  
 525 converges to a global optima, it follows that the EM algorithm for the original non-convex  
 526 MTD parameterization also converges to a global optima. ■

527

#### REFERENCES

- 528 [1] S. BOYD AND L. VANDENBERGHE, *Convex optimization*, Cambridge university press, 2004.  
 529 [2] A. HARIS, N. SIMON, AND A. SHOJAIE, *Generalized sparse additive models*, arXiv preprint  
 530 arXiv:1903.04641, (2019).  
 531 [3] D. R. HUNTER AND K. LANGE, *A tutorial on mm algorithms*, The American Statistician, 58 (2004),  
 532 pp. 30–37, <https://doi.org/10.1198/0003130042836>, <https://doi.org/10.1198/0003130042836>, <https://arxiv.org/abs/https://doi.org/10.1198/0003130042836>.  
 533 [4] M. JAGGI, *Revisiting frank-wolfe: Projection-free sparse convex optimization.*, in ICML (1), 2013, pp. 427–  
 534 435.  
 535 [5] S. LACOSTE-JULIEN AND M. JAGGI, *On the global linear convergence of frank-wolfe optimization variants*,  
 536 in Advances in Neural Information Processing Systems 28, C. Cortes, N. D. Lawrence, D. D. Lee,  
 537 M. Sugiyama, and R. Garnett, eds., Curran Associates, Inc., 2015, pp. 496–504, [http://papers.nips.](http://papers.nips.cc/paper/5925-on-the-global-linear-convergence-of-frank-wolfe-optimization-variants.pdf)  
 538 [cc/paper/5925-on-the-global-linear-convergence-of-frank-wolfe-optimization-variants.pdf](http://papers.nips.cc/paper/5925-on-the-global-linear-convergence-of-frank-wolfe-optimization-variants.pdf).  
 539 [6] S. LÈBRE AND P.-Y. BOURGUIGNON, *An em algorithm for estimation in the mixture transition distribution*  
 540 *model*, Journal of Statistical Computation and Simulation, 78 (2008), pp. 713–729, [https://doi.org/10.](https://doi.org/10.1080/00949650701266666)  
 541 [1080/00949650701266666](https://doi.org/10.1080/00949650701266666), <https://doi.org/10.1080/00949650701266666>, <https://arxiv.org/abs/https://doi.org/10.1080/00949650701266666>.  
 542 [7] Y.-A. MA, N. J. FOTI, AND E. B. FOX, *Stochastic gradient mcmc methods for hidden markov models*, in  
 543 Proceedings of the 34th International Conference on Machine Learning-Volume 70, JMLR. org, 2017,  
 544 pp. 2265–2274.  
 545 [8] D. PAULIN ET AL., *Concentration inequalities for markov chains by marton couplings and spectral methods*,  
 546 Electronic Journal of Probability, 20 (2015).  
 547 [9] A. RAKHLIN, K. SRIDHARAN, AND A. TEWARI, *Sequential complexities and uniform martingale laws of*  
 548 *large numbers*, Probability Theory and Related Fields, 161 (2015), pp. 111–153.  
 549 [10] S. VAN DE GEER, *Estimation and testing under sparsity*, Lecture notes in mathematics, 2159 (2016).  
 550 [11] D. WULSIN, E. FOX, AND B. LITT, *Parsing epileptic events using a markov switching process model for*  
 551 *correlated time series*, in International Conference on Machine Learning, 2013, pp. 356–364.  
 552  
 553
